1 ***Arabidopsis* UGT76B1 glycosylates *N*-hydroxy-pipecolic acid and inactivates**  
2 **systemic acquired resistance in tomato**

3

4 **Authors:**

5 Eric C. Holmes<sup>1</sup>, Yun-Chu Chen<sup>2</sup>, Mary Beth Mudgett<sup>2\*</sup>, and Elizabeth S. Sattely<sup>1,3\*</sup>

6

7 <sup>1</sup>Department of Chemical Engineering, Stanford University, Stanford, CA, 94305, USA

8 <sup>2</sup>Department of Biology, Stanford University, Stanford, CA, 94305, USA

9 <sup>3</sup>Howard Hughes Medical Institute

10 \*Corresponding authors. Email: [sattely@stanford.edu](mailto:sattely@stanford.edu) (E.S.S.); [mudgett@stanford.edu](mailto:mudgett@stanford.edu)  
11 (M.B.M.)

12

13 **Short Title:** NHP glycosylation inactivates immunity

14

15 The authors responsible for distribution of materials integral to the findings presented in  
16 this article in accordance with the policy described in the Instructions for Authors  
17 ([www.plantcell.org](http://www.plantcell.org)) are: Elizabeth S. Sattely ([sattely@stanford.edu](mailto:sattely@stanford.edu)) and Mary Beth  
18 Mudgett ([mudgett@stanford.edu](mailto:mudgett@stanford.edu))

19

20

21

22

23

24

25

26 **Abstract**

27 Systemic acquired resistance (SAR) is a mechanism that plants utilize to connect a  
28 local pathogen infection to global defense responses. *N*-hydroxy-pipecolic acid (NHP)  
29 and a glycosylated derivative are produced during SAR, yet their individual roles in the  
30 response have not yet been elucidated. Here we report that *Arabidopsis thaliana*  
31 UGT76B1 can generate glycosylated NHP (NHP-Glc) *in vitro* and when transiently  
32 expressed alongside *Arabidopsis* NHP biosynthetic genes in two Solanaceous plants.  
33 During infection, *Arabidopsis ugt76b1* mutants do not accumulate NHP-Glc and  
34 accumulate less glycosylated salicylic acid (SA-Glc) than wild type plants. The  
35 metabolic changes in *ugt76b1* mutant plants are accompanied by enhanced defense to  
36 the bacterial pathogen *Pseudomonas syringae*, suggesting that glycosylation of SAR  
37 molecules NHP and SA by UGT76B1 plays an important role in defense modulation.  
38 Transient expression of *Arabidopsis UGT76B1* with the *Arabidopsis* NHP biosynthesis  
39 genes *ALD1* and *FMO1* in tomato increases NHP-Glc production and reduces NHP  
40 accumulation in local tissue, and abolishes the systemic resistance seen when  
41 expressing NHP-biosynthetic genes alone. These findings reveal that the glycosylation  
42 of NHP by UGT76B1 alters defense priming in systemic tissue and provide further  
43 evidence for the role of the NHP aglycone as the active metabolite in SAR signaling.

44

45

## 46 Introduction

47 Systemic acquired immunity in plants is a coordinated defense response that leads to  
48 heightened disease protection throughout the plant body following an initial, localized  
49 pathogen attack. Several small molecules have been found to help orchestrate this  
50 process, including the ubiquitous hormone salicylic acid (SA) (Klessig et al., 2018), and  
51 the newly-discovered the signaling metabolite *N*-hydroxy-pipecolic acid (NHP) (Chen et  
52 al., 2018; Hartmann et al., 2018), which is thought to have a lead role in SAR. The  
53 enzyme flavin monooxygenase 1 (FMO1) catalyzes the *N*-hydroxylation of the  
54 nonproteinogenic amino acid pipecolic acid (Pip) in the biosynthesis of NHP and is  
55 required for the initiation and amplification to SAR signaling (Chen et al., 2018;  
56 Hartmann et al., 2018).

57 Both SA and NHP can be isolated from plants with several metabolic modifications,  
58 most notably as the glycosylated derivatives. In prior work using *Arabidopsis* plants, we  
59 and others have observed that both NHP and its hexose-conjugated derivative (NHP-  
60 Glc) accumulate after bacterial infection in seedlings and leaves (Chen et al., 2018;  
61 Hartmann and Zeier, 2018). Both NHP-Glc and the aglycone are absent from unelicited  
62 plants and pathway mutants deficient in FMO1, prompting questions about the role of  
63 NHP glycosylation in SAR. The glycosyltransferase required for generation of NHP-Glc  
64 however has remained elusive.

65 Structural modifications of small plant signaling molecules appear to have evolved as a  
66 dynamic mechanism to modulate the activity of these chemical signals. Common  
67 enzymatic modifications to base hormone scaffolds include hydroxylation, carboxylation,  
68 sulfation, acetylation, methylation, amino acid conjugation, and glycosylation (Westfall  
69 et al., 2013). Some hormones, such as the defense hormone jasmonic acid, undergo  
70 multiple enzymatic modifications (Wasternack and Hause, 2013) to create bioactive  
71 (Staswick and Tiryaki, 2004), inactive (Smirnova et al., 2017), and differentially active  
72 (Nakamura et al., 2011) compounds. Often, loss of function mutants of these modifying  
73 enzymes can have severe impact on plant physiology, leading to developmental  
74 phenotypes in the case of auxins (Nakazawa et al., 2001; Takase et al., 2004; Staswick  
75 et al., 2005), brassinosteroids (Choi et al., 2013), and gibberellins (Wang et al., 2012)

76 and to altered responses to environmental stresses in the case of abscisic acid (Liu et  
77 al., 2015), jasmonic acid (JA) (Caarls et al., 2017; Smirnova et al., 2017), and SA (Liu et  
78 al., 2009; Boachon et al., 2014). In some instances, hormone conjugation appears to  
79 serve as a reservoir of a molecule for fast deployment, in other cases it seems to be a  
80 metabolic mechanism for attenuating activity and depleting the active form (Piotrowska  
81 and Bajguz, 2011).

82 Several lines of evidence show that the NHP aglycone is sufficient to initiate SAR  
83 signaling but have not yet revealed a functional role for glycosylation. For example, the  
84 treatment of *Arabidopsis thaliana* (Chen et al., 2018; Hartmann et al., 2018), *Capsicum*  
85 *annuum* (sweet pepper) (Holmes et al., 2019), or *Solanum lycopersicum* (tomato)  
86 (Holmes et al., 2019) leaves with synthetic NHP induces resistance against bacterial  
87 infection in distal tissues not treated with NHP. Furthermore, transient overexpression of  
88 the *Arabidopsis* NHP biosynthetic enzymes AGD2-like defense protein 1 (ALD1;  
89 (Navarova et al., 2012)) and FMO1 (Chen et al., 2018; Hartmann et al., 2018) leads to  
90 the production of NHP in tomato leaves and results in enhanced resistance to bacterial  
91 infection in distal tissues (Holmes et al., 2019). Notably, NHP-Glc was not detected in  
92 the NHP treated tomato leaves, suggesting that NHP-Glc synthesis and/or accumulation  
93 may not occur in tomato. These data, coupled with the observation that NHP-Glc does  
94 not accumulate in the absence of infection in *Arabidopsis*, suggests NHP-Glc is not  
95 simply a storage form of NHP.

96 Despite the clear role of NHP biosynthesis for the initiation of systemic resistance,  
97 several open questions remain regarding (i) the active form of NHP metabolites, (ii) the  
98 potential role of NHP glycosylation in modulating SAR signaling, and (iii) more broadly,  
99 mechanisms of signal initiation, transport, and attenuation in plant systemic resistance.  
100 In an effort to better understand the potential role of NHP-Glc in the SAR response, we  
101 sought to establish the genetic and biochemical basis for NHP glycosylation in  
102 *Arabidopsis* and test the influence of the putative glycosylating enzyme(s) in the SAR-  
103 mediated disease resistance. Here we report that *Arabidopsis* UDP-glycosyltransferase  
104 UGT76B1 can generate glycosylated NHP (NHP-Glc) *in vitro* and when transiently  
105 expressed alongside *Arabidopsis* NHP biosynthetic genes in two Solanaceous plants.

106 Our results provide new insight into how plants use specific metabolic transformations  
107 to alter the behavior of the key signaling molecule NHP in systemic defense.

108

109



## 111 **Results**

### 112 *Heterologously expressed Arabidopsis UGT76B1 glycosylates NHP in planta*

113 Previous studies have indicated that NHP-Glc accumulates in Arabidopsis after  
114 pathogen infection (Chen et al., 2018; Hartmann and Zeier, 2018). We hypothesized  
115 that a dedicated NHP-glycosyltransferase may be highly expressed under pathogen  
116 stress conditions (Figure 1A). We analyzed a set of publicly available microarray  
117 datasets for the mRNA expression pattern of 103 Arabidopsis UDP-dependent  
118 glycosyltransferase genes (*UGTs*) under various biotic stress conditions  
119 (Supplementary Figure 1). We prioritized testing of candidate *UGTs* based upon their  
120 high level of mRNA abundance across all biotic stress conditions and selected a few  
121 others based upon their high level of mRNA abundance under a specific pathogen  
122 stress. For the initial screen, we selected 14 *UGTs* from this microarray analysis  
123 (Supplementary Figure 1) as well as four additional *UGTs* (*UGT73B2*, *UGT73B3*,  
124 *UGT73C3*, and *UGT73C5*) based on expression profiles in RNA sequencing  
125 experiments (Bernsdorff et al., 2016; Hartmann et al., 2018). Our goal was to first  
126 identify Arabidopsis *UGTs* that could generate NHP during heterologous expression and  
127 subsequently determine the role of any candidates in Arabidopsis.

128 In previous studies, we used *Agrobacterium*-mediated transient expression in *Nicotiana*  
129 *benthamiana* (Kapila et al., 1997) as a heterologous expression platform to produce  
130 NHP *in planta* (Chen et al., 2018; Holmes et al., 2019). Under these transient  
131 expression conditions, NHP-Glc was not detected in extracts from *N. benthamiana*  
132 leaves (Chen et al., 2018; Holmes et al., 2019). We hypothesized that this heterologous  
133 expression system could be used to screen Arabidopsis UGT candidates with minimal  
134 background signal from native enzymes. We cloned 18 candidate *UGT* cDNAs and then  
135 transiently expressed them with Arabidopsis *ALD1* and *FMO1* (the minimal set of genes  
136 required for NHP biosynthesis (Holmes et al., 2019) in *N. benthamiana* leaves. To  
137 expedite testing and metabolite analysis, we expressed our candidate enzymes in  
138 groups of three by combining *Agrobacteria* strains harboring separate *UGT* candidates  
139 and *GFP* in equal proportions and co-infiltrated them with *Agrobacteria* harboring *ALD1*  
140 and *FMO1*.

141 Liquid chromatography-mass spectrometry (LC-MS) analysis of methanolic extracts  
142 from these leaves revealed that one set of genes tested (*UGT76B1*, *UGT76F2*, and  
143 *UGT85A1*) led to significant accumulation of NHP-Glc when coexpressed with *ALD1*  
144 and *FMO1* compared to coexpression of *ALD1* and *FMO1* with *GFP* (Figure 1B). We  
145 then transiently expressed each of these respective *UGTs* with *ALD1* and *FMO1* and  
146 found that leaves expressing *UGT76B1* (At3g11340) were the only ones that  
147 accumulated a significant amount of NHP-Glc (Figure 1B). *N. benthamiana* leaves  
148 transiently expressing *ALD1*, *FMO1*, and *UGT76B1* accumulated significantly less free  
149 NHP (as measured using LC-MS) than did leaves expressing *ALD1* and *FMO1* alone,  
150 indicating a high conversion rate from NHP to NHP-Glc by *UGT76B1* (Supplementary  
151 Figure 2). The compound produced in *N. benthamiana* had the same LC-MS retention  
152 time (Figure 1C) and MS/MS fragmentation pattern (Figure 1D) as NHP-Glc produced in  
153 adult Arabidopsis leaves, suggesting that Arabidopsis *UGT76B1* is producing the same  
154 glycosylated NHP derivative as natively accumulates in Arabidopsis.

#### 155 *In vitro* biochemistry of *UGT76B1* expressed from *N. benthamiana* and *E. coli*

156 Previous studies have shown that *UGT76B1* glycosylates the plant hormone salicylic  
157 acid (SA) and the isoleucine catabolite 2-hydroxy-3-methyl-pentanoic acid (ILA) *in vitro*  
158 and contributes to the accumulation of their respective glycosides *in planta* (von Saint  
159 Paul et al., 2011; Noutoshi et al., 2012; Maksym et al., 2018; Bauer et al., 2020). Our  
160 results in *N. benthamiana* suggested that *UGT76B1* could glycosylate a third defense-  
161 related metabolite, NHP. To confirm these previous results and to determine that the  
162 NHP-Glc we detected in *N. benthamiana* was a direct result of *UGT76B1* activity, we  
163 spiked crude protein extracts from *N. benthamiana* leaves expressing *GFP* or *UGT76B1*  
164 with UDP-glucose and the aglycone substrates ILA, SA, or NHP. Protein extracts from  
165 leaves expressing *GFP* did not produce any of the respective glycosides while extracts  
166 from leaves expressing *UGT76B1* produced all three (Figure 2A). Furthermore, we  
167 transiently expressed His-tagged *UGT76B1* in *N. benthamiana* leaves and enriched for  
168 *UGT76B1* using Ni-NTA affinity purification. Partially purified *UGT76B1*-6xHis from *N.*  
169 *benthamiana* catalyzed the synthesis of NHP-Glc *in vitro* while denatured protein did not  
170 (Figure 2B).



171 Given the promiscuity of some plant UGTs on structurally-similar substrates (Lim et al.,  
172 2002), it is unsurprising that UGT76B1 can glycosylate ILA, SA, and NHP. To better  
173 understand the ability of this enzyme to glycosylate these substrates, we expressed and  
174 enriched UGT76B1-6xHis from *E. coli* (Figure 2C) and then tested its activity using an  
175 enzyme-coupled assay (Zegzouti et al., 2013). During each UGT catalytic reaction, UDP  
176 is released and the concentration of free UDP in a given reaction can be directly  
177 measured using this assay. Reactions with NHP generated significantly more UDP over  
178 the course of one hour than was generated with SA or ILA as substrates (Figure 2D).  
179 The initial rate of reaction with NHP was also approximately 2x faster than with either  
180 SA or ILA (Figure 2E). These results confirm that UGT76B1 acts on ILA, SA, and NHP  
181 and indicates it is more active on NHP as a substrate in these conditions.

182 To determine where glucose conjugation is occurring on NHP, we derivatized synthetic  
183 NHP and an extract from *N. benthamiana* leaves transiently expressing ALD, FMO1,  
184 and UGT76B1 with trimethylsilyldiazomethane (TMSD), a reagent commonly used to  
185 selectively methylate carboxylic acids (Kühnel et al., 2007; Topolewska et al., 2015).  
186 Derivatization of synthetic NHP generated a major, singly methylated product and a  
187 minor doubly methylated product (Supplementary Figure 3A). We hypothesize the singly  
188 methylated product to be NHP methyl ester based upon MS/MS fragmentation and the  
189 reported activity of TMSD (Supplementary Figure 3A). Derivatization of the *N.*  
190 *benthamiana* extract revealed a methylated NHP-Glc product with an MS/MS  
191 fragmentation pattern that matches that of NHP methyl ester (Supplementary Figure  
192 3B), suggesting that UGT76B1 is generating NHP- $\beta$ -D glucoside. UGT76B1 is also  
193 known to generate the  $\beta$ -D glucoside of salicylic acid (SA-Glc) (von Saint Paul et al.,  
194 2011; Noutoshi et al., 2012). A synthetic standard of NHP-Glc (which is currently  
195 unavailable) is required to definitively elucidate the structure of the glycosylated NHP  
196 produced by UGT76B1.

#### 197 *Arabidopsis ugt76b1* mutant plants are impaired in NHP-Glc and SA-Glc production

198 Given that UGT76B1 is capable of glycosylating NHP when expressed heterologously in  
199 *N. benthamiana*, we next sought to determine its native function in *Arabidopsis*. We  
200 obtained the Syngenta *Arabidopsis* Insertion Library (SAIL) (Sessions et al., 2002) T-

201 DNA insertional line SAIL\_1171\_A11 (*ugt76b1-1*; furthermore *ugt76b1*) from the  
202 Arabidopsis Biological Resource Center (ABRC). This mutant line was previously used  
203 to study the function of *UGT76B1* (von Saint Paul et al., 2011). To quantify NHP and SA  
204 derivatives, we grew WT Arabidopsis Col-0 (furthermore WT) and *ugt76b1* plants  
205 axenically in hydroponic media for two weeks, treated seedlings with 10 mM MgCl<sub>2</sub>  
206 (mock), *Pseudomonas syringae* pathovar tomato DC3000 (*Pst*), 1 mM NHP, or 100 μM  
207 SA, and then measured metabolites using GC-MS and LC-MS (Figure 3 and  
208 Supplementary Figure 4). WT plants had significantly higher abundance of NHP-Glc  
209 and SA-Glc than did *ugt76b1* in *Pst*-treated plants (Figure 3), highlighting an important  
210 contribution from UGT76B1 in the glycosylation of NHP and SA during infection. While  
211 NHP-treated *ugt76b1* plants did contain detectable NHP-Glc, the abundance was  
212 reduced over 99% when compared to WT plants, suggesting that UGT76B1 is the  
213 primary NHP glycosyltransferase in Arabidopsis (Supplemental Figure 4). There may be  
214 other minor enzymes that contribute to NHP glycosylation, but NHP-Glc was only  
215 detectable in *ugt76b1* plants when a high concentration of NHP was supplemented  
216 (Supplementary Figure 4) and not when treated with *Pst* (Figure 3). The abundance of  
217 SA-Glc was reduced approximately 60% in *ugt76b1* plants compared to WT when  
218 supplemented with SA (Supplementary Figure 4), suggesting that the activity of  
219 UGT76B1 may also contribute significantly to the glycosylation of SA in Arabidopsis.

#### 220 *Arabidopsis ugt76b1* mutants are more resistant to bacterial infection

221 A previous study showed Arabidopsis *ugt76b1* mutants were more resistant to the  
222 biotrophic pathogen *Pst* and more susceptible to the necrotrophic pathogen *Alternaria*  
223 *brassicicola* (von Saint Paul et al., 2011), indicating that UGT76B1 plays a critical role in  
224 the regulation of disease resistance signaling. Given UGT76B1 can glycosylate NHP in  
225 Arabidopsis (Figure 3 and Supplemental Figure 4), we hypothesized that UGT76B1 may  
226 regulate the abundance of NHP that is available to initiate and sustain defense priming  
227 during SAR. To test this hypothesis and explore the function of NHP-Glc and UGT76B1,  
228 we performed SAR experiments as previously described (Chen et al., 2018; Hartmann  
229 et al., 2018). Briefly, three lower leaves (leaf number 5-7) of four-week-old WT, *ugt76b1*,  
230 and *fmo1* (a NHP and SAR deficient mutant) were infiltrated with 10 mM MgCl<sub>2</sub> (mock)

231 or a  $5 \times 10^6$  cfu/ml suspension of *Pst avrRpt2*, an avirulent strain that induces a strong  
232 defense response in WT plants. Two days later, an upper leaf of each plant was  
233 challenged with a  $1 \times 10^5$  cfu/ml suspension of *Psm* ES4326, a virulent strain (Figure 4A  
234 and Supplemental Figure 5A). Disease symptoms and titers of *Psm* ES4326 in the  
235 infected upper leaves were then photographed and quantified at 3 days post infiltration  
236 (dpi), respectively (Figure 4B and Supplemental Figure 5B).

237 Upper leaves from WT plants initially treated with *Pst avrRpt2* harbored significantly less  
238 growth of *Psm* ES4326 than did WT plants treated with mock (Figure 4B), and  
239 developed fewer disease symptoms (e.g. bacterial speck and chlorosis; Supplemental  
240 Figure 5B), indicating the establishment of SAR. By contrast, SAR protection was  
241 abolished in *fmo1* plants (Figure 4B and Supplemental Figure 5B). Notably, the titers of  
242 *Psm* ES4326 in upper leaves of mock-treated *ugt76b1* plants were significantly lower  
243 than those of mock-treated WT plants. In addition, the titers of *Psm* ES4326 in the  
244 upper leaves of *ugt76b1* plants treated with mock and *Pst avrRpt2* were similar (Figure  
245 4B), indicating that an initial pathogen infection was not required for disease resistance  
246 in the *ugt76B1* leaves. We also observed that all lower leaves (mock or *Pst avrRpt2*) of  
247 *ugt76b1* plants showed early senescence on the leaf margin (Supplemental Figure 5B),  
248 consistent with a prior report (von Saint Paul et al., 2011). Taken together, these  
249 findings indicate that mutation of *UGT76B1* leads to enhanced resistance regardless of  
250 an initial pathogen infection.

251 Based on our observations that *ugt76b1* seedlings have altered abundances of NHP,  
252 SA, and their glycosylated forms (Figure 3 and Supplementary Figure 4), we next  
253 determined the abundance of these metabolites using a modification of the SAR assay.  
254 We used the same experimental setup; however, we did not challenge with *Psm*  
255 ES4326. Instead, we harvested lower and upper leaves 2 days after mock or *Pst*  
256 *avrRpt2* treatment for metabolite analysis. We detected high background levels of Pip,  
257 SA, and SA-Glc in mock-treated *ugt76b1* plants, indicating that these plants are already  
258 primed with both NHP- and SA-related metabolites (Supplementary Figure 5C and D).  
259 Neither *fmo1* nor *ugt76b1* plants accumulated any NHP-Glc, while WT plants showed  
260 significant increases in both lower and upper leaves (Figure 4C), confirming the

261 requirement for these two enzymes in the NHP-Glc biosynthetic pathway. As previously  
262 reported (von Saint Paul et al., 2011), *ugt76b1* plants contained significantly more SA-  
263 Glc than WT plants in mock conditions, suggesting that other UGTs are still able to  
264 generate SA-Glc at appreciable levels in this context (Supplementary Figure 5D). We  
265 did not directly detect any free NHP in this experiment, and we hypothesize that this is  
266 due to the instability of the molecule (Chen et al., 2018). The abundance of  
267 decarboxylated NHP (DC-NHP; which has been reported as a degradation product of  
268 NHP (Chen et al., 2018)) was significantly elevated in mock- and *Pst avrRpt2*-treated  
269 *ugt76b1* plants (Figure 4C), suggesting the constitutive accumulation of NHP and its  
270 subsequent degradation (either *in planta* or during the metabolite extraction process).  
271 Taken together, these results indicate that enhanced resistance in *ugt76b1* is  
272 associated with elevated abundance of NHP- and SA-related metabolites in uninduced  
273 conditions.

#### 274 *Expression of UGT76B1 abolishes NHP-induced protection in tomato*

275 The enhanced resistance exhibited by Arabidopsis *ugt76b1* mutants with significantly  
276 reduced levels of NHP-Glc suggested that the glycosylation of NHP reduces its  
277 bioactivity as a SAR signaling molecule. To explore this idea, we employed a transient  
278 SAR assay in tomato to study the phenotypic effect of increasing the relative abundance  
279 of NHP-Glc relative to NHP. In previous work, we established that transient expression  
280 of Arabidopsis ALD1 and FMO1 in tomato leaflets proximal to the main stem is sufficient  
281 to induce the production of NHP and inhibit the growth of *Pst* in infected distal leaflets  
282 (Holmes et al., 2019). Notably, altering NHP levels in tomato did not lead to the  
283 production of NHP-Glc (Holmes et al., 2019). Therefore, we reasoned that we could use  
284 this heterologous system as an experimental platform to study the role Arabidopsis  
285 UGT76B1 and NHP-Glc in SAR without significant contribution from native tomato  
286 UGTs.

287 We hypothesized that overexpression of Arabidopsis UGT76B1 with ALD1 and FMO1  
288 would increase the ratio of NHP-Glc relative to NHP in proximal tomato leaflets and  
289 decrease the SAR response in distal leaflets infected with *Pst*. To test this, we infiltrated  
290 the two proximal leaflets of a fully expanded tomato leaf with *Agrobacteria* strains

291 harboring *GFP* or *GFP + ALD1 + FMO1* (Pathway), or Pathway + *UGT76B1* (Figure  
292 5A). Two days post-infiltration, we harvested both proximal and distal leaflets for  
293 metabolite analysis (Figure 5A, C, and D). Proximal leaflets accumulated significantly  
294 less NHP and SA when expressing *UGT76B1* alongside the NHP biosynthetic genes  
295 than did leaflets expressing NHP biosynthetic genes alone (Figure 5C and D).  
296 Conversely, these leaflets accumulated significantly more NHP-Glc and SA-Glc,  
297 suggesting direct conversion of the aglycones (Figure 5C and D). The only significant  
298 metabolic change that occurred in distal leaflets was an accumulation of free SA in  
299 leaves expressing only the NHP metabolic pathway enzymes (Supplemental Figure 6).

300 Using the same experimental design as for metabolite profiling, we inoculated two  
301 proximal tomato leaflets with *Agrobacteria* strains harboring *GFP* or *GFP + ALD1 +*  
302 *FMO1* (Pathway), or Pathway + *UGT76B1* (Figure 5A). At 48 h post inoculation, we  
303 challenged three distal leaflets with a  $1 \times 10^5$  cfu/ml suspension of *Pst*. Consistent with a  
304 previous report (Holmes et al., 2019), transient expression of the NHP pathway in  
305 proximal leaflets resulted in significant protection against *Pst* in challenged distal leaflets  
306 when compared to that of transient expression of *GFP* alone (Figure 5B). Notably, this  
307 systemic resistance was compromised when *UGT76B1* was overexpressed alongside  
308 the NHP pathway in proximal leaflets. Expressing *UGT76B1* alone did not alter  
309 protection when compared to expressing *GFP* alone (Supplemental Figure 7). Together,  
310 these results demonstrate that overexpression of *UGT76B1* is sufficient to convert NHP  
311 to NHP-Glc. Moreover, these data indicate that increasing the abundance of NHP-Glc is  
312 not sufficient to induce defense priming.

313

314



## 316 Discussion

317 UGTs are a highly expanded class of biosynthetic enzymes in plants with 120 members  
318 in the Arabidopsis genome (Paquette et al., 2003). Characterized UGTs from  
319 Arabidopsis have diverse roles, including detoxification of xenobiotic substrates and  
320 regulation of active hormone levels. Substrate promiscuity is a feature of some plant  
321 UGTs, allowing them to conjugate diverse xenobiotic substrates (Osmani et al., 2009)  
322 while others have evolved to be far more specific, including the glycosyltransferases  
323 UGT74F1 and UGT74F2 which glycosylate SA in a regiospecific manner (George  
324 Thompson et al., 2017). The role of hormone-specific UGTs is often to generate  
325 inactive, yet stable storage forms that, in some cases, may be hydrolyzed back into  
326 active molecule (Westfall et al., 2013). Our results indicate that NHP-Glc is an inactive  
327 or less active derivative of NHP in Arabidopsis and tomato. It is unknown whether NHP-  
328 Glc can be enzymatically hydrolyzed back into NHP to reactivate immune signaling;  
329 however, little to no NHP-Glc accumulates in Arabidopsis plants in the absence of  
330 infection (Chen et al., 2018), which suggests that NHP biosynthesis is the primary  
331 mechanism to initiate NHP-dependent SAR signaling.

332 By mining publicly available Arabidopsis mRNA expression data, we found that the core  
333 NHP biosynthetic genes *ALD1* and *FMO1* appear to be tightly co-regulated. Even  
334 though *UGT76B1* is induced under many pathogen stress conditions, its expression is  
335 not as highly correlated with the core pathway genes across these same conditions  
336 (Supplemental Figure 8). We observed a similar phenomenon with known SA UGTs  
337 (Supplementary Figure 8). This suggests that differential expression of hormone  
338 modifying UGTs with different pathogen stressors may help coordinate dynamic  
339 immune responses. This highlights the importance of further investigation into the how  
340 transcriptional and/or posttranscriptional regulation of *UGT76B1* expression affects the  
341 abundance of bioactive metabolites during SAR. It has also been reported that  
342 *UGT76B1* is constitutively expressed in roots (von Saint Paul et al., 2011), suggesting  
343 that it may also play role in tissue-specific regulation of metabolite levels.

344 While NHP-Glc is the primary form of NHP detected in Arabidopsis and in the closely-  
345 related plant *Brassica rapa* (Chen et al., 2018; Holmes et al., 2019), we did not observe



346 accumulation of NHP-Glc in *N. benthamiana* or tomato without ectopic expression of  
347 *Arabidopsis UGT76B1*. These data differ from patterns of accumulation observed for  
348 SA-Glc, which has been reported in diverse plant families, including the Solanaceae  
349 (Lee et al., 1995). We have shown that expression of UGT76B1 can inactivate NHP-  
350 related pathogen defense in tomato (Figure 5), which raises the question of how, or if,  
351 tomato can natively modulate abundance of NHP, the active SAR signal. Other  
352 compounds downstream of NHP have been reported during transient expression of  
353 NHP biosynthetic enzymes in *N. benthamiana* (Chen et al., 2018; Holmes et al., 2019),  
354 and these may represent distinct mechanisms that have evolved to modulate the  
355 abundance of active hormone during defense in other plant species.

356 Previous work has shown that *ugt76b1* plants have increased resistance to *Pst* and  
357 altered SA-dependent gene expression in local tissues (von Saint Paul et al., 2011). Our  
358 results reveal that *ugt76b1* plants have a basal level of resistance to *Psm* ES4326  
359 infection equivalent to an SAR response induced in WT plants (Figure 4). It is possible  
360 that the increased availability of free NHP may be a driver of this phenotype in *ugt76b1*,  
361 as these plants have little to no ability to glycosylate NHP (Figure 3 and Supplemental  
362 Figure 4) and that NHP is known to be a potent modulator of defense (Chen et al.,  
363 2018; Hartmann et al., 2018).

364 Many aspects of plant defense are intimately intertwined. Complex regulatory  
365 mechanisms underlie responses to different pathogens (Glazebrook, 2005) and  
366 coordination of SAR (Shah et al., 2014). Vital components of the *Arabidopsis* signaling  
367 network include NHP and SA, which are both required to establish functional SAR  
368 (Klessig et al., 2018; Hartmann and Zeier, 2019). RNA sequencing has uncovered a  
369 large overlap between NHP- and SA-dependent gene regulation, but also the presence  
370 of SA-independent regulation in SAR (Bernsdorff et al., 2016; Hartmann et al., 2018;  
371 Hartmann and Zeier, 2019). Our biochemical studies now show that the enzyme  
372 previously known to glycosylate SA and ILA (von Saint Paul et al., 2011; Maksym et al.,  
373 2018) can also metabolize NHP (Supplemental Figure 4 and Supplemental Figure 5),  
374 further connecting these signaling molecules. It is possible that the true biological



375 function of UGT76B1 is to glycosylate a set of small molecules and that all of them play  
376 distinct roles in defense.

377 Notably, our experiments in tomato provide additional evidence that NHP is a bioactive  
378 signaling molecule in SAR and reveal that glycosylation can be used to modulate this  
379 systemic response. Simply by expressing UGT76B1 alongside the NHP biosynthetic  
380 enzymes in tomato, the beneficial effect of producing NHP was abolished (Figure 5B).  
381 This finding provides insight into how plants regulate potent immune signals and may be  
382 critical for engineering approaches that seek to tune enhanced resistance in tomato.  
383 Efforts to improve resistance using synthetic chemicals has been challenging due to an  
384 inherent imbalance of plant defense and growth in the presence of inducers (Heil et al.,  
385 2000; Huot et al., 2014). Engineering immunity using synthetic approaches will need to  
386 address defense-yield tradeoffs plants naturally make to balance limited resources  
387 (Mauch et al., 2001; Ning et al., 2017). While NHP may be protective in the context of  
388 infection, constitutive expression would likely cause unintended growth defects, and any  
389 stable system would require inducible control of pathway enzymes and a mechanism to  
390 attenuate the signal in the absence of infection. We have shown that UGT76B1 can  
391 eliminate the NHP-dependent SAR signal in tomato (Figure 5), and this activity could be  
392 leveraged to engineer dynamic control over crop defense.

393 In closing, our results reveal that metabolism by the UDP-glycosyltransferase UGT76B1  
394 plays critical role in modulating Arabidopsis immunity by glycosylating NHP, the key  
395 chemical initiator of SAR. We anticipate that the association of UGT76B1 with NHP  
396 signaling will more broadly contribute to our understanding of how plants use metabolic  
397 transformations of small plant signals to tune the dynamics, tissue specificity, and  
398 spatial regulation of defense responses.

399

400

401

## 402 **Materials and methods**

### 403 *Gene expression and correlation analysis*

404 Arabidopsis microarray datasets were obtained from the NASCArrays database  
405 (Craigon et al., 2004) (indexed experiments can be found at  
406 [http://arabidopsis.info/affy/link\\_to\\_iplant.html](http://arabidopsis.info/affy/link_to_iplant.html)). Log-scaled gene expression ratios were  
407 calculated from experiments 120, 122, 123, 167, 169, 330, 415, and 447 as previously  
408 (Rajniak et al., 2015). Pearson's  $r$  correlation coefficient between genes was calculated  
409 from  $\log_2$  normalized expression data from these microarray datasets.

### 410 *Plant materials and growth conditions*

411 For seedling hydroponics experiments, *A. thaliana* ecotype Col-0 (WT), homozygous  
412 Syngenta Arabidopsis Insertion Library (SAIL) (Sessions et al., 2002) or T-DNA  
413 insertional line (SAIL\_1171\_A11; *ugt76b1-1*; Col-0 background) seeds were surface  
414 sterilized with 50% ethanol for 1 minute, 50% bleach for 10 min, washed 3 times in  
415 sterile water, and resuspended in 1x Murashige-Skoog (MS) medium with vitamins  
416 (PhytoTechnology Laboratories) (pH 5.7). Seeds were placed into 3 ml of MS medium +  
417 5 g/l sucrose in wells of 6-well culture plates (5 seeds/well). Plates were sealed with  
418 micropore tape (3M), vernalized at 4°C for 48 h, and transferred to a growth chamber at  
419 50% humidity, 22°C, and 100  $\mu\text{mol}/\text{m}^2/\text{s}$  photon flux on a 16-h/8-h day/night cycle. After  
420 1 week, spent medium was removed and replaced with 3 ml of fresh MS medium + 5 g/l  
421 sucrose. Plants were elicited after an additional week of growth. For adult Arabidopsis  
422 experiments, Col-0, *fmo1-1* (SALK\_026163; Col-0 background), and *ugt76b1* plants  
423 were grown in a growth chamber at 80% humidity, 22°C, and 100  $\mu\text{mol}/\text{m}^2/\text{s}$  photon flux  
424 on a 16-h/8-h day/night cycle. For tomato (*S. lycopersicum* cultivar VF36) experiments,  
425 plants were grown in a greenhouse (16-h/8-h day/night cycle, 25°-28°C) for 4-5 weeks.  
426 *N. benthamiana* plants were grown in soil on a growth shelf with a 16-h light cycle for 4  
427 weeks prior to transient expression.

428

### 429 *Cloning of Arabidopsis UGT candidate genes*

430 *Agrobacterium tumefaciens* GV3101 and C58C1 pCH32 strains harboring Arabidopsis  
431 *ALD1* and *FMO1* genes in the pEAQ-HT vector (Peyret and Lomonosoff, 2013) were  
432 constructed previously (Holmes et al., 2019). Arabidopsis UGT candidates were  
433 polymerase chain reaction (PCR)-amplified from Arabidopsis WT complementary DNA  
434 (cDNA) using gene-specific primers (Supplemental Table 1), cloned into pEAQ-HT  
435 between *AgeI* and *SmaI* cut sites using Gibson assembly, and transformed into *E. coli*  
436 10-β. Sequence-confirmed plasmids were then transformed into *A. tumefaciens*  
437 GV3101 using heat shock. For creation of a His-tagged construct, Arabidopsis  
438 *UGT76B1* was PCR-amplified from WT cDNA using gene-specific primers  
439 (Supplemental Table 1), cloned into the pET24b vector under control of a T7 promoter,  
440 and transformed into *E. coli* BL21.

#### 441 *Transient expression in N. benthamiana*

442 *Agrobacteria* strains were grown on LB agar plates with appropriate antibiotics for 24 h.  
443 Cells were scraped from plates with an inoculation loop, washed three times with  
444 *Agrobacterium* induction medium [10 mM MES buffer, 10 mM MgCl<sub>2</sub>, and 150 μM  
445 acetosyringone (pH 5.7)], resuspended in *Agrobacterium* induction medium, and  
446 incubated at room temperature for 2 h with agitation. For screening of candidate UGTs,  
447 *Agrobacteria* harboring *ALD1*, *FMO1*, and respective *UGT* genes were combined in  
448 equal proportions with each at an OD<sub>600</sub> of 0.1. In all cases, *Agrobacteria* harboring  
449 *GFP* was added to ensure an equal final OD<sub>600</sub> of 0.6. These solutions were infiltrated  
450 into leaves of 4-week-old *N. benthamiana* plants using needleless syringes. Plants were  
451 incubated for 72 h on growth shelves on a 16-h light/8-h dark cycle prior to sample  
452 harvest.

#### 453 *Sample harvest and derivatizations*

454 For all metabolomics experiments, plant tissue was harvested, lyophilized to dryness,  
455 and homogenized using a ball mill (Retsch MM 400) at 25 Hz for 2 min. Single-well  
456 Arabidopsis hydroponics samples were resuspended in 500 μl of 80:20 MeOH:H<sub>2</sub>O and  
457 incubated at 4°C for 10 min. *N. benthamiana* and tomato samples were resuspended in  
458 20 μl of 80:20 MeOH:H<sub>2</sub>O per mg dry tissue and incubated at 4°C for 10 min. The liquid  
459 fraction of each sample was split for LC-MS and GC-MS analysis respectively. Samples

460 for GC-MS analysis were further derivatized with *N*-methyl-*N*-  
461 (trimethylsilyl)trifluoroacetamide (MSTFA) (Holmes et al., 2019). Samples were  
462 derivatized with trimethylsilyldiazomethane (TMSD) using previously established  
463 methods (Topolewska et al., 2015). Briefly, 200 µl dried methanolic extracts were  
464 resuspended in 125 µl, methanol, 50 µl toluene, and 50 µl 2M TMSD in hexane,  
465 incubated for 1 h at room temperature, dried under N<sub>2</sub>, and resuspended in 200 µl AcN  
466 + 0.1% formic acid for LC-MS analysis.

#### 467 *LC-MS analysis*

468 NHP, NHP-Glc and TMSD-derivatized NHP and NHP-Glc were measured using  
469 previously published methods on an Agilent 1260 HPLC coupled to an Agilent 6520  
470 quadrupole time-of-flight electrospray ionization (Q-TOF ESI) mass spectrometer (Chen  
471 et al., 2018). For *in vitro* metabolomics experiments, SA-Glc and ILA-Glc were  
472 measured using the same parameters except in negative ionization mode. NHP-Glc and  
473 TMSD-derivatized NHP compounds were fragmented using a collision-induced  
474 dissociation energy (CID) of 10 V. TMSD-derivatized NHP-Glc was fragmented using a  
475 CID of 40 V. Extracted ion chromatogram (EIC) values were determined by extracting  
476 chromatograms with a 20 ppm error and integrating peak areas using MassHunter  
477 software (Agilent).

478 SA and SA-Glc were measured using an Agilent 1290 Infinity II UHPLC coupled to an  
479 Agilent 6470 triple quadrupole (QQQ) mass spectrometer. A 1.8 µm, 2.1 x 50 mm  
480 Zorbax RRHD Eclipse Plus C18 column was used for reverse phase chromatography  
481 with mobile phases of A [water with 0.1% formic acid (FA)] and B [acetonitrile (AcN) with  
482 0.1% FA]. The following gradient was used for separation with a flow rate of 0.6 ml/min  
483 (percentages indicate percent buffer B): 0-0.2 min (5%), 0.2-4.2 min (5-95%), 4.2-5.2  
484 min (95-100%). The MS was run in negative mode with the following parameters: gas  
485 temperature, 250C; gas flow rate, 12 l/min; nebulizer, 25 psig. SA was measured using  
486 monitored transitions with the following parameters: Precursor ion, 137.0239; product  
487 ions, 93 and 65.1; dwell, 150 ms; fragmentor voltage, 158 V; collision energy, 20 V and  
488 32 V respectively, cell accelerator voltage, 4 V. SA-Glc was measured using monitored  
489 transitions with the following parameters: Precursor ion, 299.0767; product ions, 137

490 and 93; dwell, 150 ms; fragmentor voltage, 158 V; collision energy, 5 V and 20 V  
491 respectively, cell accelerator voltage, 4 V.

#### 492 *GC-MS analysis*

493 TMS-derivatized samples were measured for Pip and NHP using published methods on  
494 an Agilent 7820A gas chromatograph coupled to an Agilent 5977B mass spectrometer  
495 (Holmes et al., 2019).

#### 496 *Bacterial strains and growth conditions*

497 *Escherichia coli* strain 10- $\beta$ , *Pseudomonas syringae* strains *pv. tomato* DC3000 (*Pst*),  
498 *pv. maculicola* ES4326 (*Psm* ES4326), and *pv. tomato* harboring the avirulence gene  
499 *avrRpt2* (*Pst avrRpt2*), and *Agrobacterium tumefaciens* strains GV3101 and C58C1  
500 pCH32 were used in this study. *E. coli* strains were grown in lysogeny broth (LB) agar  
501 containing appropriate antibiotics at 37°C. *Pseudomonas* strains were grown at 28°C on  
502 nutrient yeast glycerol agar (NYGA) medium containing rifampicin (100  $\mu$ g/ml).  
503 *Agrobacteria* strains were grown at 28°C on LB agar containing rifampicin (100  $\mu$ g/ml),  
504 tetracycline (5  $\mu$ g/ml), and kanamycin (50  $\mu$ g/ml) for C58C1 pCH32 and gentamycin  
505 (100  $\mu$ g/ml) and kanamycin (50  $\mu$ g/ml) for GV3101.

#### 506 *Elicitation methods*

507 For hydroponics experiments, *Pst* was grown on LB agar plates at 30°C. A single colony  
508 was grown in liquid LB media to an OD<sub>600</sub> of ~0.5, washed three times, and  
509 resuspended to an OD<sub>600</sub> of 0.1 in MS media + 5 g/l sucrose. 30  $\mu$ l of 1 M MgCl<sub>2</sub> (mock),  
510 100 mM NHP, 10 mM SA, or the *Pst* solution were used for elicitation.

#### 511 *SAR assays in Arabidopsis*

512 SAR bacterial growth assays were performed as described (Chen et al., 2018). 30-32-  
513 day-old Col-0, *fmo1*, and *ugt76b1* plants were used in this assay. Briefly, three lower  
514 leaves (leaf number 5-7) of each plant were infiltrated with 10 mM MgCl<sub>2</sub> or a 5 $\times$ 10<sup>6</sup>  
515 cfu/ml suspension of *Pst avrRpt2* in 10 mM MgCl<sub>2</sub>. Two days later, one upper leaf (leaf  
516 number 10) of each plant was inoculated with a 1 $\times$ 10<sup>5</sup> cfu/ml suspension of *Psm*  
517 *ES4326*, and then plants were kept with a dome to maintain humidity. The disease

518 symptoms of *Psm ES4326* infected upper leaves were photographed at 3 dpi, and then  
519 titer of *Psm ES4326* in these leaves was quantified by homogenizing leaves discs in 1  
520 ml of 10 mM MgCl<sub>2</sub>, plating appropriate dilutions on NYGA medium with rifampicin (100  
521 µg/ml). Plates were incubated at 28 °C for 2 days prior to counting bacterial colonies.

#### 522 *Metabolic profiling of defense priming in Arabidopsis*

523 Three lower leaves (leaf number 5-7) of 30-32-day-old Col-0, *fmo1* and *ugt76b1*  
524 *Arabidopsis* plants were infiltrated with 10 mM MgCl<sub>2</sub> and a 5×10<sup>6</sup> cfu/ml suspension of  
525 *Pst avrRpt2* in 10 mM MgCl<sub>2</sub>. Forty-eight h later, the three treated lower leaves and  
526 three untreated upper leaves (leaf number 8-10) were harvested, pooled, respectively,  
527 then frozen in liquid nitrogen for metabolic profiling by GC-MS, LC-MS, and triple  
528 quadrupole (QQQ)-MS analysis.

#### 529 *Transient expression and SAR assays in tomato*

530 Transient expression and SAR assays were performed as previously (Holmes et al.,  
531 2019). Briefly, combinations of *Agrobacterium* C58C1 pCH32 strains harboring  
532 combinations of *GFP*, *FMO1*, *ALD1*, and *UGT76B1* were infiltrated into two proximal  
533 (bottom) leaflets of the third and fourth compound leaves of 4-5-week old tomato plants  
534 for 48 h. For metabolic profiling, two proximal and three distal leaflets of the third  
535 compound leaf were harvested. For tomato, the three distal leaflets of the fourth  
536 compound leaves were inoculated with a 1×10<sup>5</sup> cfu/ml suspension of *Pst*. Plants were  
537 incubated for four additional days, and then the titer of *Pst* was determined by plating  
538 serial dilutions (Holmes et al., 2019).

#### 539 *In vitro* assays

540 Crude protein was extracted from 80 mg of fresh tissue from *N. benthamiana* leaves  
541 transiently expressing GFP, UGT76B1, or UGT76B1-6xHis using the P-PER plant  
542 protein extraction kit (Pierce). Crude extracts of GFP and UGT76B1 were used directly  
543 in *in vitro* metabolomics assays. Protein concentrations were determined using a  
544 bicinchoninic acid assay kit (Pierce). All *in vitro* metabolomics assays with protein from  
545 *N. benthamiana* were performed in 200 µl reaction volumes at room temperature with  
546 the following concentration of reagents: 0.1 M Tris-HCl pH 7.5, 5 mM UDP-Glucose, 1



547 µg total protein, and 0.5 mM aglycone (NHP, SA, or ILA). Reactions were quenched by  
548 adding 50 µl reaction to 150 µl AcN.

549 *E. coli* BL21 strains harboring His-tagged UGT76B1 were grown overnight at 37°C in  
550 LB. Two ml of overnight culture was inoculated into 25 ml LB and cultures were grown  
551 at 37°C to an OD<sub>600</sub> of 0.6. Cultures were then induced with 0.5 mM IPTG and grown for  
552 an additional 5 hours at 28°C. Cells were harvested and disrupted using an emulsiflex  
553 B15 (Avestin). Soluble fractions were enriched using gravity flow through Ni-NTA  
554 agarose resin and eluted with increasing concentrations of imidazole. Proteins were  
555 concentrated using 30 kDa centrifugal filters and buffer-exchanged into 50 mM Tris-HCl,  
556 pH 8 with 10% glycerol and kept at -80°C for long-term storage.

557 *In vitro* time course experiments were performed with 1 µM enriched *E. coli* UGT76B1-  
558 6xHis protein fraction in 200 µl reactions containing 0.1 M Tris-HCl pH 7.5, 0.5 mM  
559 UDP-Glc, and aglycone substrates at a concentration of 0.5 mM. Reactions were  
560 monitored as a time course at 5, 10, 30, and 60 min. Free UDP was measured as a  
561 proxy for reaction progress using the UDP-Glo enzyme assay kit (Promega) (Zegzouti  
562 et al., 2013)

563 *Accession numbers.*

564 The sequence data for this article can be found in the Arabidopsis Genome Initiative  
565 under the following accession numbers: UGT71B4 (AT4G15260), UGT73B2  
566 (AT4G34135), UGT73B3 (AT4G34131), UGT73C5 (AT2G36800), UGT73D1  
567 (AT3G53150), UGT74F2 (AT2G43820), UGT76B1 (AT3G11340), UGT76F2  
568 (AT3g55700), UGT85A1 (AT1G22400), UGT85A7 (AT1G22340), UGT86A2  
569 (AT2G28080), UGT89A2 (AT5G03490), UGT73C3 (AT2G36780), UGT92A1  
570 (AT5G12890), UGT73B4 (AT2G15490), UGT87A2 (AT2G30140), UGT76E12  
571 (AT3G46660), ALD1 (AT2G13810), and FMO1 (AT1G19250). Germplasm used in this  
572 study includes *fmo1-1* (SALK\_026163) and *ugt76b1-1* (SAIL\_1171\_A11).

573 *List of supplemental materials.*

574 **Supplemental Figure 1.** mRNA expression profiles of candidate Arabidopsis *UGT*  
575 genes (Supports Figure 1).

576 **Supplemental Figure 2.** Arabidopsis UGT76B1 glycosylates NHP in *N. benthamiana*  
577 (Supports Figure 1).

578 **Supplemental Figure 3.** Trimethylsilyldiazomethane (TMSD) derivatization of NHP and  
579 NHP-Glc (Supports Figure 1).

580 **Supplemental Figure 4.** Metabolic profiling of Arabidopsis WT and *ugt76b1* mutant  
581 seedlings (Supports Figure 3).

582 **Supplemental Figure 5.** Metabolic profiling of Arabidopsis WT, *fmo1* and *ugt76b1*  
583 plants in SAR experiment (Supports Figure 4).

584 **Supplemental Figure 6.** Abundance of SA in distal leaflets of tomato during transient  
585 expression of NHP-Glc pathway genes (Supports Figure 5).

586 **Supplemental Figure 7.** Effect of transient expression of Arabidopsis UGT76B1 in  
587 tomato leaves for transient SAR analysis (Supports Figure 5).

588 **Supplemental Figure 8.** mRNA expression and coexpression analysis of SA-Glc and  
589 NHP-Glc biosynthetic genes in Arabidopsis obtained from publicly available microarray  
590 data.

591 **Supplemental Table 1.** Primers used in this study.

592

### 593 **Acknowledgements:**

594 We thank George Lomonosoff (John Innes Centre) for providing the pEAQ plasmid.  
595 We thank K. Smith and J. Foret (Stanford) for helpful discussions. This work was  
596 supported by the Howard Hughes Medical Institute (E.S.S.), an National Science  
597 Foundation Graduate Research Fellowship DGE-1656518 (to E.C.H.), National Science  
598 Foundation IOS-1555957 and Binational Science Foundation Grant 2011069 (to  
599 M.B.M.) and Ministry of Science and Technology of Taiwan-105-2917-I-564-093 (to  
600 Y.C.C.).

### 601 **Author Contributions:**

602 E.C.H., Y.C.C., E.S.S. and M.B.M designed the research; E.C.H. and Y.C.C. performed  
603 research; E.C.H., Y.C.C., E.S.S. and M.B.M. analyzed data; and E.C.H., Y.C.C., E.S.S.  
604 and M.B.M. wrote the paper.

605

606

607

608





Main text figures:

**Figure 1.** Screen of 18 Arabidopsis UGTs for their ability to glycosylate NHP.

**Figure 2.** *In vitro* characterization of Arabidopsis UGT76B1.

**Figure 3.** Abundance of NHP- and SA-related metabolites in WT and *ugt76b1* mutant seedlings.

**Figure 4.** SAR assays in Arabidopsis WT, *ugt76b1* and *fmo1* plants.

**Figure 5.** Transient expression of Arabidopsis *UGT76B1* with *ALD1* and *FMO1* in tomato leaves.

Supplemental Figures:

**Supplemental Figure 1.** mRNA expression profiles of candidate Arabidopsis *UGT* genes (Supports Figure 1).

**Supplemental Figure 2.** Arabidopsis UGT76B1 glycosylates NHP in *N. benthamiana* (Supports Figure 1).

**Supplemental Figure 3.** Trimethylsilyldiazomethane (TMSD) derivatization of NHP and NHP-Glc (Supports Figure 1).

**Supplemental Figure 4.** Metabolic profiling of Arabidopsis WT and *ugt76b1* mutant seedlings (Supports Figure 3).

**Supplemental Figure 5.** Metabolic profiling of Arabidopsis WT, *fmo1* and *ugt76b1* plants in SAR experiment (Supports Figure 4).

**Supplemental Figure 6.** Abundance of SA in distal leaflets of tomato during transient expression of NHP-Glc pathway genes (Supports Figure 5).

**Supplemental Figure 7.** Effect of transient expression of Arabidopsis UGT76B1 in tomato leaves for transient SAR analysis (Supports Figure 5).

**Supplemental Figure 8.** mRNA expression and coexpression analysis of SA-Glc and NHP-Glc biosynthetic genes in Arabidopsis obtained from publicly available microarray data.

**Supplemental Table 1.** Primers used in this study.

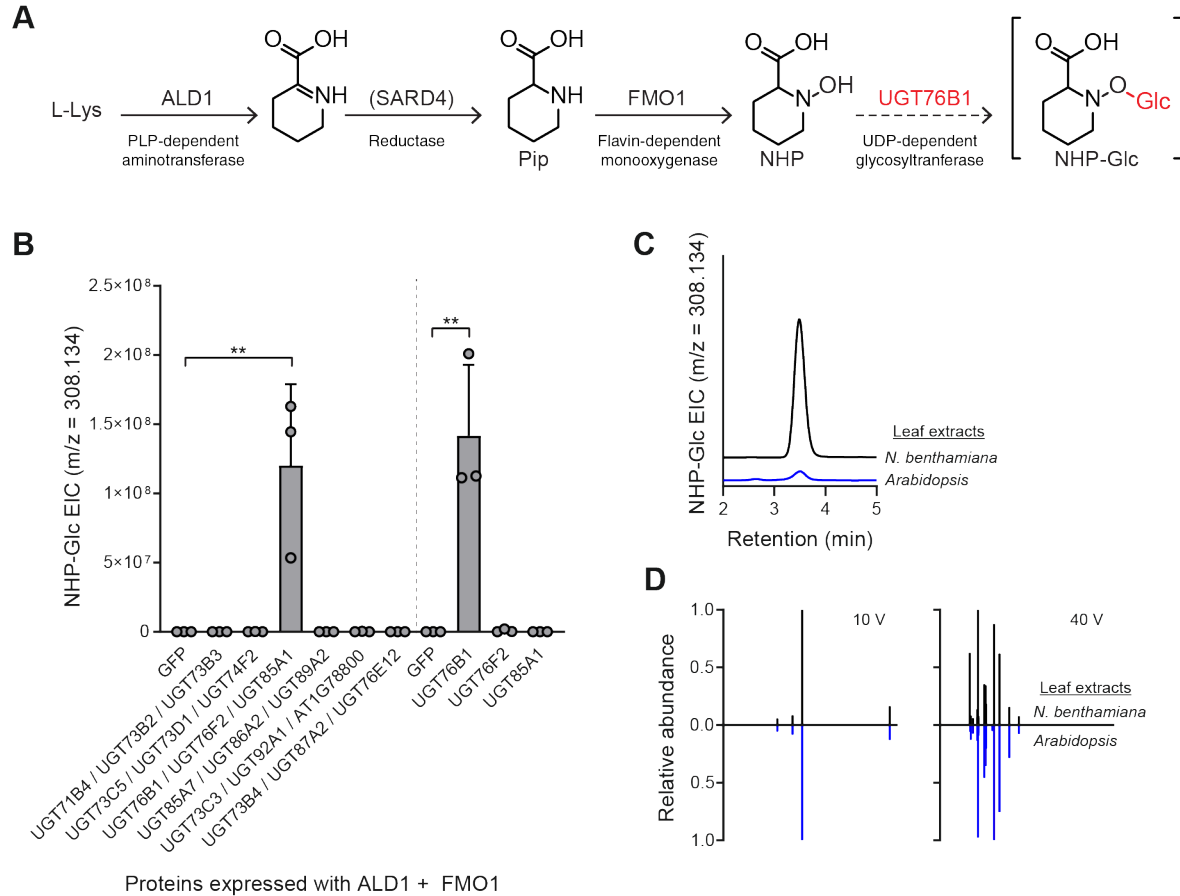

**Figure 1. Screen of 18 Arabidopsis UGTs for their ability to glycosylate NHP.**

- (A) Biosynthetic pathway for production of NHP-Glc from L-Lys in Arabidopsis. The biosynthetic activity of UGT76B1 was characterized in this work.
- (B) Abundance of NHP-Glc measured with LC-MS after transient expression of GFP or respective Arabidopsis UGTs alongside Arabidopsis ALD1 + FMO1 in *N. benthamiana* leaves. In initial screen, *Agrobacteria* strains harboring distinct UGTs were combined in equal proportions and co-infiltrated with *Agrobacteria* strains harboring ALD1 and FMO1. In second screen, *Agrobacteria* strains harboring UGT76B1, UGT76F2, or UGT85A1 were separately co-infiltrated with *Agrobacteria* strains harboring ALD1 and FMO1. Total inoculum (OD<sub>600</sub>) was kept constant in both experiments by including *Agrobacteria* harboring GFP as a control. Bars represent the mean  $\pm$  SD ( $n = 3$  independent biological replicates). Values reported as zero indicate no detection of metabolites. Asterisks indicate a significant NHP-Glc increase (one-tailed  $t$  test;  $**P < 0.01$ ).
- (C) Representative LC-MS chromatograms of NHP-Glc ( $m/z = 308.134$ ) in extracts from transient expression of ALD1 + FMO1 + UGT76B1 in *N. benthamiana* (black) and Arabidopsis adult leaves (blue) after infiltration with 1 mM NHP synthetic standard.
- (D) Comparative MS/MS spectra of NHP-Glc in extracts from transient expression of ALD1 + FMO1 + UGT76B1 in *N. benthamiana* (black) and Arabidopsis adult leaves (blue) after infiltration with 1 mM NHP synthetic standard at collision energies of 10V and 40V.

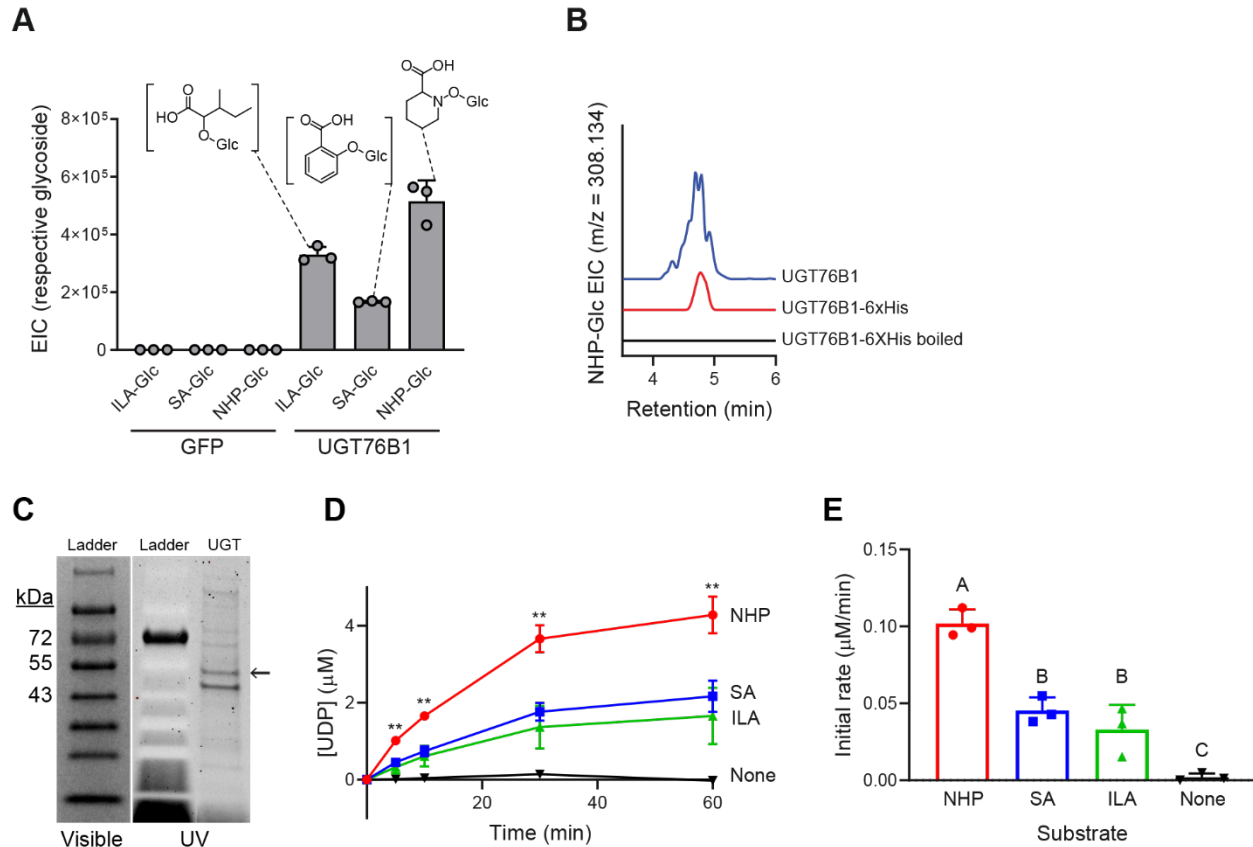

**Figure 2. *In vitro* characterization of Arabidopsis UGT76B1.**

- (A) GFP or Arabidopsis UGT76B1 were transiently expressed in *N. benthamiana* leaves and crude protein extracts were incubated with 5 mM UDP glucose and 1 mM aglycone substrates (2-hydroxy-3-methylvaleric acid (ILA), salicylic acid (SA), or NHP). Levels indicate abundances of glycosides measured with LC-MS after 3 h incubation. Bars represent the mean  $\pm$  SD ( $n = 3$  independent biological replicates).  $m/z$  used for quantification are: ILA-Glc ( $[M-H]^- = 293.124$ ), SA-Glc ( $[M-H]^- = 299.077$ ), and NHP-Glc ( $[M+H]^+ = 308.134$ ).
- (B) Representative LC-MS chromatograms of NHP-Glc ( $m/z = 308.134$ ) from crude extract from *N. benthamiana* leaves transiently expressing Arabidopsis UGT76B1 (blue), and enriched (red) or denatured (black) UGT76B1-6xHis purified from *N. benthamiana* leaves.
- (C) SDS-PAGE gel of enriched UGT76B1-6xHis purified from *E. coli*. Same gel imaged under visible light and UV light is included to better visualize ladder bands. Expected mass of UGT76B1-6xHis is  $\sim 51$  kDa.
- (D) Enriched UGT76B1-6xHis from *E. coli* was incubated with NHP (red), SA (blue), ILA (green), or no substrate (black) *in vitro*. Aliquots were quenched at increasing time points and free UDP liberated from the reaction of UGT76B1 with its respective substrates was measured using an enzyme-linked assay. Asterisks indicate a significant difference (two-tailed  $t$  test;  $**P < 0.01$ ). Points represent the mean  $\pm$  SD ( $n = 3$  independent biological replicates).
- (E) Initial rate of reaction from (D) was measured as the slope from  $t = 0$  to  $t = 5$  min. Letters indicate significantly different groups using two-tailed  $t$ -tests ( $P < 0.01$ ). Bars represent the mean  $\pm$  SD ( $n = 3$  independent biological replicates).

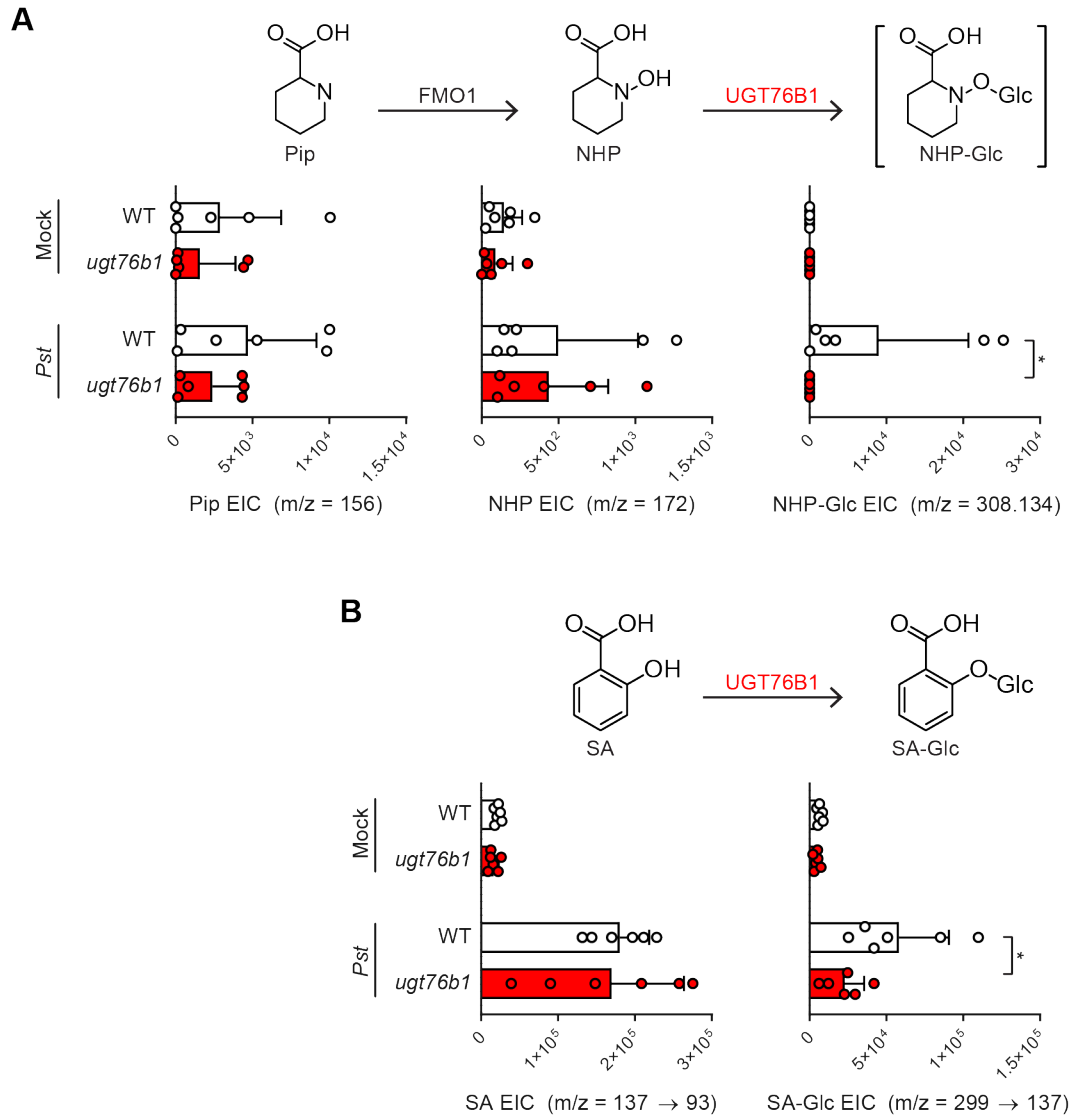

**Figure 3. Abundance of NHP- and SA-related metabolites in WT and *ugt76b1* mutant seedlings.**

Arabidopsis WT (white bars) and *ugt76b1* (red bars) seedlings were grown axenically in hydroponic media for two weeks and treated with 10 mM MgCl<sub>2</sub> (mock), or a suspension of *Pst* at OD<sub>600</sub> of 0.01. After 24 h, seedlings were harvested and analyzed for NHP-related metabolites (A) and SA-related metabolites (B). Pip and NHP were measured as trimethylsilyl (TMS) and 2-TMS derivatives, respectively, using GC-MS. NHP-Glc, SA, and SA-Glc were measured using LC-MS. Bars represent the means ± SD ( $n = 6$  independent biological replicates). Values reported as zero indicate no detection of metabolites. Asterisks indicate a significant metabolite decrease in *ugt76b1* plants (one-tailed  $t$  test;  $*P < 0.05$ ).

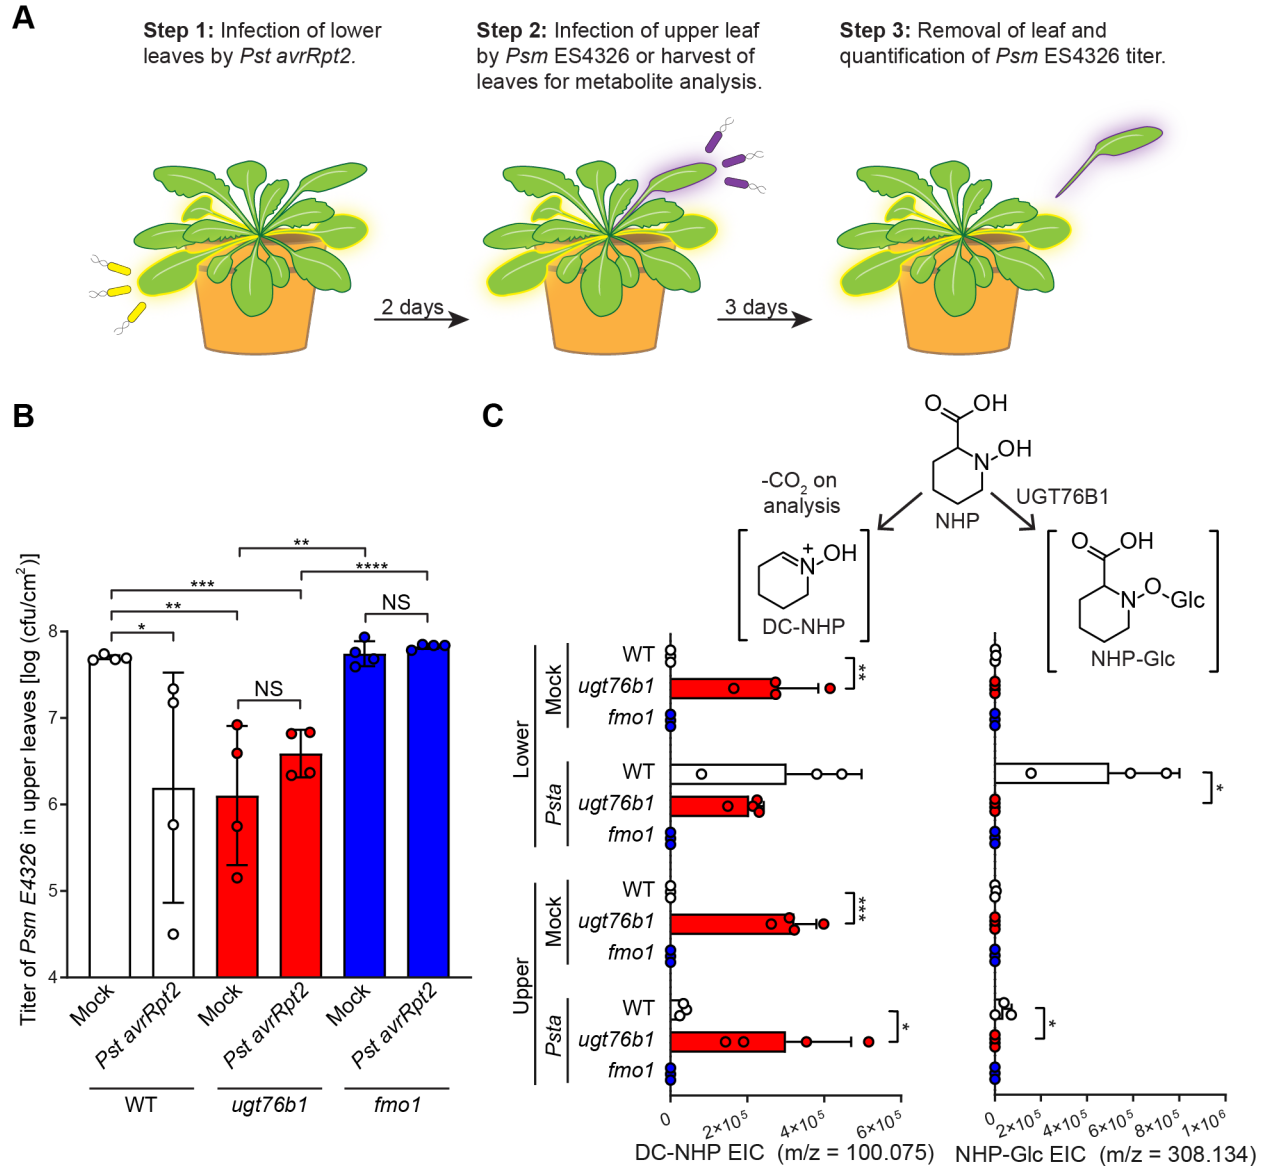

**Figure 4. SAR assays in Arabidopsis WT, *ugt76b1* and *fmo1* plants.**

- (A) Design of SAR assays in Arabidopsis. Three lower leaves (leaf number 5-7) of each plant were infiltrated with a  $5 \times 10^6$  cfu/ml suspension of *Pst avrRpt2* (*Psta*) (local infection) or 10 mM MgCl<sub>2</sub> as a mock control. For bacterial growth assays in (B): two days after local infection, one upper leaf (leaf number 10) of each plant was challenged with  $1 \times 10^5$  cfu/ml suspension of *Psm* ES4326 (distal infection). Three days later, the disease symptoms of upper leaves were photographed and the titer of *Psm* ES4326 was determined. For metabolite analysis in (C): two days after local infection with *Pst avrRpt2*, the three lower infected leaves and three upper uninfected leaves (leaf numbers 8, 9, and 10) were harvested and separately pooled for metabolite analysis.
- (B) Titer of *Psm* ES4326 in upper, challenged leaves of WT (white bars), *ugt76b1* (red bars), and *fmo1* (blue bars) plants. Bars represent the mean  $\pm$  SD ( $n = 4$  independent biological replicates). Asterisks indicate a significant change in bacterial titer (one-tailed  $t$  test; \* $P < 0.05$ , \*\* $P < 0.01$ , \*\*\* $P < 0.001$ , \*\*\*\* $P < 0.0001$ , NS – not significant). The experiment was repeated three times with similar results.

(C) Extracted ion abundances of DC-NHP (a degradation product of NHP) and NHP-Glc in methanolic tissue extracts from lower and upper leaves of WT (white bars), *ugt76b1* (red bars), and *fmo1* (blue bars) plants. Bars represent the means  $\pm$  SD ( $n = 3$  or 4 independent biological replicates). DC-NHP and NHP-Glc were measured using LC-MS. Values reported as zero indicate no detection of metabolites. Asterisks indicate a significant metabolite increase or decrease (one-tailed  $t$  test; \* $P < 0.05$ , \*\* $P < 0.01$ , \*\*\* $P < 0.001$ ).

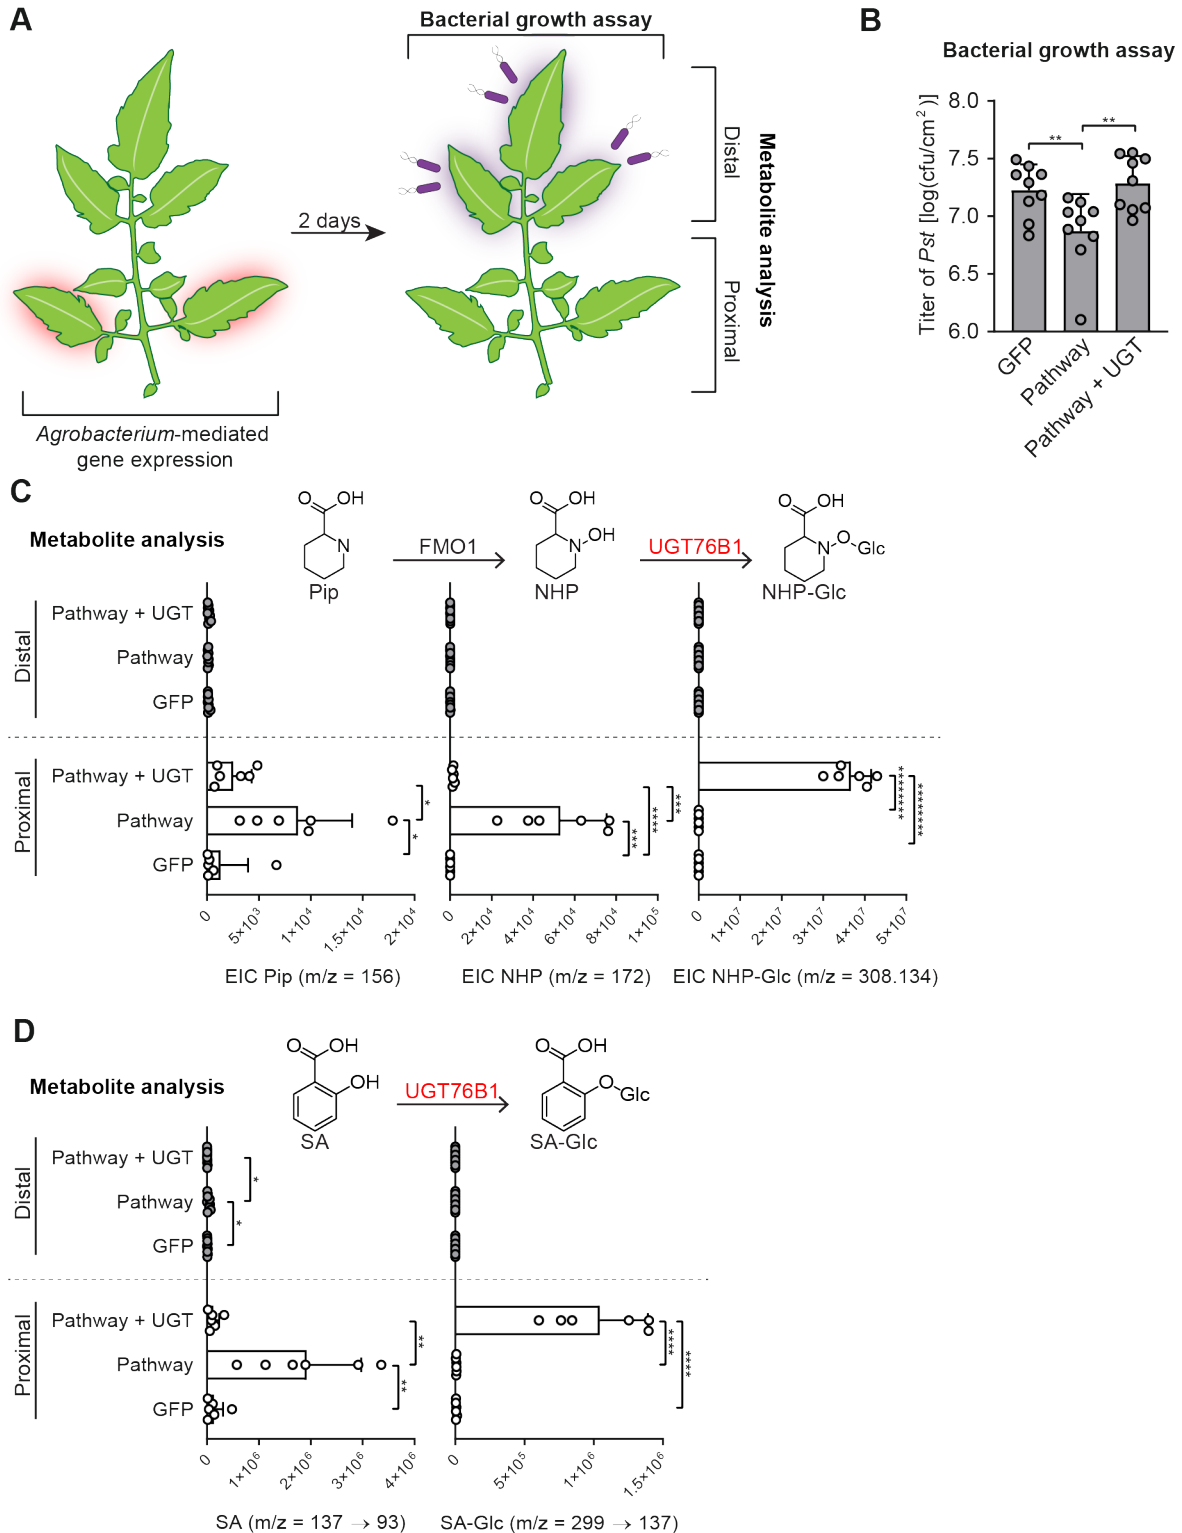

**Figure 5. Transient expression of Arabidopsis *UGT76B1* with *ALD1* and *FMO1* in tomato leaves.**

(A) Design of transient SAR assays in tomato. Two leaflets of a tomato leaf proximal to the main stem (highlighted in red) were inoculated with *Agrobacteria* harboring *GFP* (GFP) or a combination of strains harboring *GFP* + Arabidopsis *ALD1* + Arabidopsis *FMO1* (Pathway) with



out and with *Arabidopsis UGT76B1* (Pathway + UGT). For bacterial growth assay in (B): two days post infiltration with *Agrobacteria*, distal leaflets (highlighted in purple) were inoculated with a  $1 \times 10^5$  CFU/ml suspension of *Pst*. Four days post infiltration (dpi), distal leaves were harvested for quantification of *Pst* titers. For metabolite analysis in (C) and (D): two dpi with *Agrobacteria*, both proximal leaflets infiltrated with *Agrobacteria* and distal, untreated leaflets were harvested independently for analysis.

- (B) Titer of *Pst* in distal leaflets four dpi. Bars represent mean log cfu/cm<sup>2</sup>  $\pm$  SD (three leaflets each from n = 3 independent plants). Asterisks indicate a significant difference (one-tailed *t* test; \*\**P* < 0.01).
- (C) Abundances of Pip, NHP, and NHP-Glc in tomato leaflets expressing GFP, Pathway, and Pathway + UGT (white bars) and leaflets distal to those infiltrated with *Agrobacteria* (grey bars). Bars for proximal leaflets represent means  $\pm$  SD (two leaflets each from n = 3 independent plants). Bars for distal leaflets represent means  $\pm$  SD (three leaflets each from n = 3 independent plants). Pip and NHP were measured as TMS and 2-TMS derivatives respectively using GC-MS. NHP-Glc was measured using LC-MS. Values reported as zero indicate no detection of metabolites. Asterisks indicate a significant metabolite difference (one-tailed *t* test; \**P* < 0.05, \*\*\**P* < 0.001, \*\*\*\**P* < 0.0001, \*\*\*\*\**P* <  $1 \times 10^{-6}$ , \*\*\*\*\**P* <  $1 \times 10^{-7}$ ).
- (D) Abundances of SA and SA-Glc in tomato leaflets expressing GFP, Pathway, and Pathway + UGT (white bars) and leaflets distal to those infiltrated with *Agrobacteria* (grey bars). Bars for proximal leaflets represent means  $\pm$  SD (two leaflets each from n = 3 independent plants). Bars for distal leaflets represent means  $\pm$  SD (three leaflets each from n = 3 independent plants). SA and SA-Glc were measured using LC-MS. Values reported as zero indicate no detection of metabolites. Asterisks indicate a significant metabolite difference (one-tailed *t* test; \*\**P* < 0.01, \*\*\*\**P* < 0.0001).

Supplemental figures:

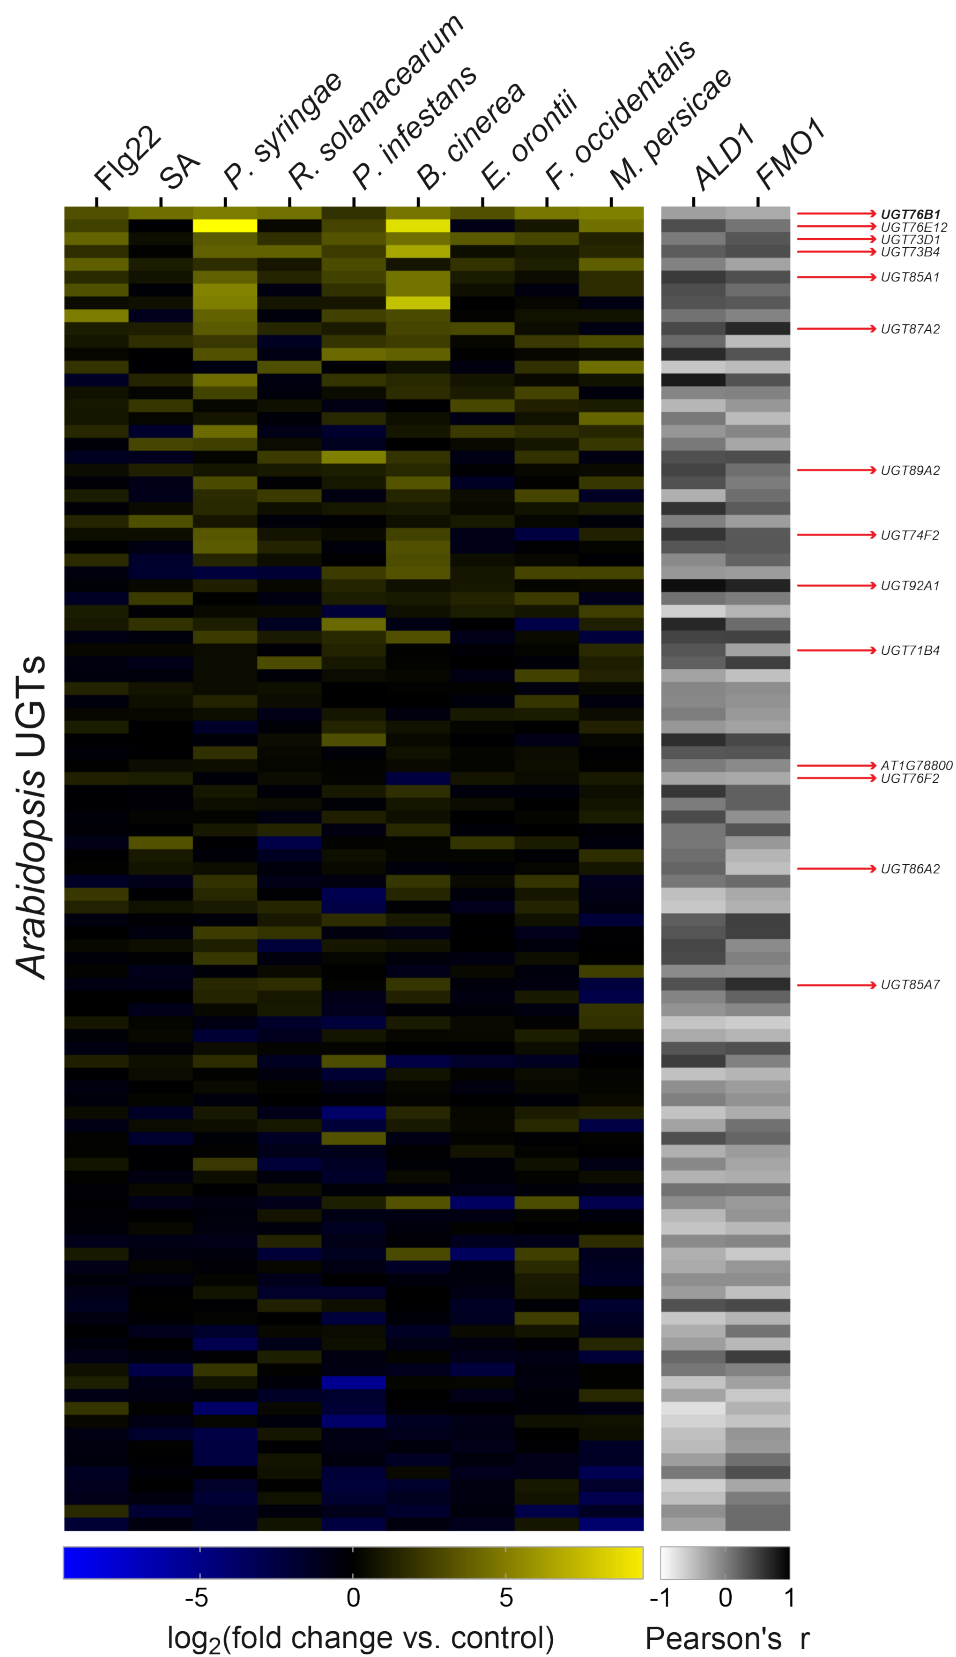

### Supplemental Figure 1. mRNA expression profiles of candidate *Arabidopsis* *UGT* genes (Supports Figure 1).

Log transformed relative mRNA expression of 103 *Arabidopsis* UDP-dependent glycosyltransferases from publicly available microarray data.  $\text{Log}_2(\text{relative expression})$  is plotted on a linear gradient from -10 (blue) to 0 (black) to 10 (yellow). Pearson's  $r$  correlation between the plotted expression patterns of the *UGTs* compared to respective NHP biosynthetic genes is plotted on a linear gradient from -1 (white) to 1 (black). *UGTs* are ordered by average relative expression across all biotic stress conditions: Flg22 (flagellin peptide), SA (salicylic acid hormone), bacterial pathogens (*Pseudomonas syringae* pv. *tomato* DC3000 and *Ralstonia solanacearum*), fungal/oomycete/ascomycete pathogens (*Botrytis cinerea*, *Phytophthora infestans*, and *Erysiphe orontii*), and insects/pests (*Frankliniella occidentalis* and *Myzus persicae*). *UGTs* tested in *N. benthamiana* during this study are indicated by red arrows. Four *UGTs* tested in *N. benthamiana* (*UGT73B2*, *UGT73B3*, *UGT73C3*, and *UGT73C5*) were not included in this expression analysis because they were not measured in the experiments analyzed.

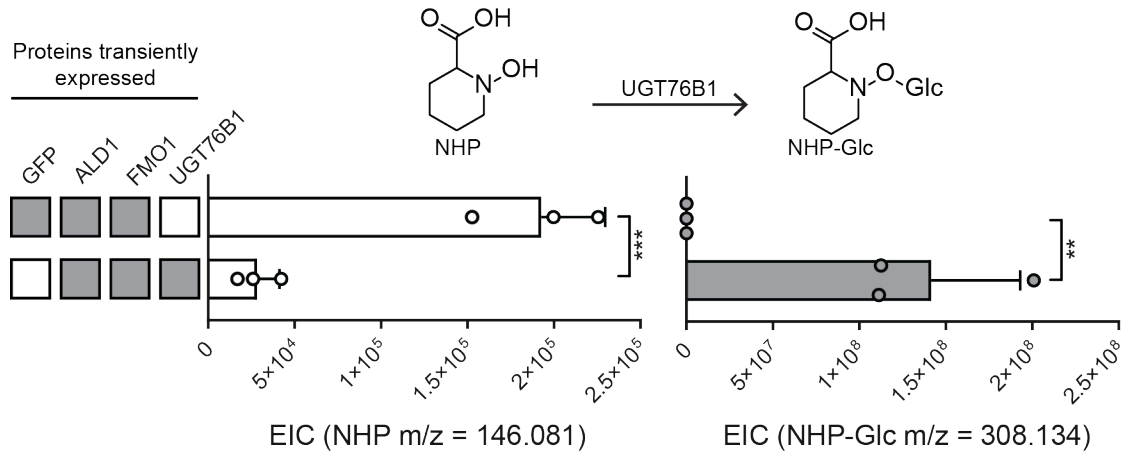

**Supplemental Figure 2. Arabidopsis UGT76B1 glycosylates NHP in *N. benthamiana* (Supports Figure 1).**

Abundances of NHP and NHP-Glc after transient expression of GFP + ALD1 + FMO1 and ALD1 + FMO1 + UGT76B1 in *N. benthamiana* leaves. Filled in grey boxes indicate an *Agrobacterium* strain including the respective gene was included in the experiment. Bars represent means  $\pm$  SD (three independent biological replicates). NHP and NHP-Glc were measured using LC-MS. Values reported as zero indicate no detection of metabolites. Asterisks indicate a significant metabolite difference (one-tailed *t* test; \*\**P* < 0.01, \*\*\**P* < 0.001).

**A**

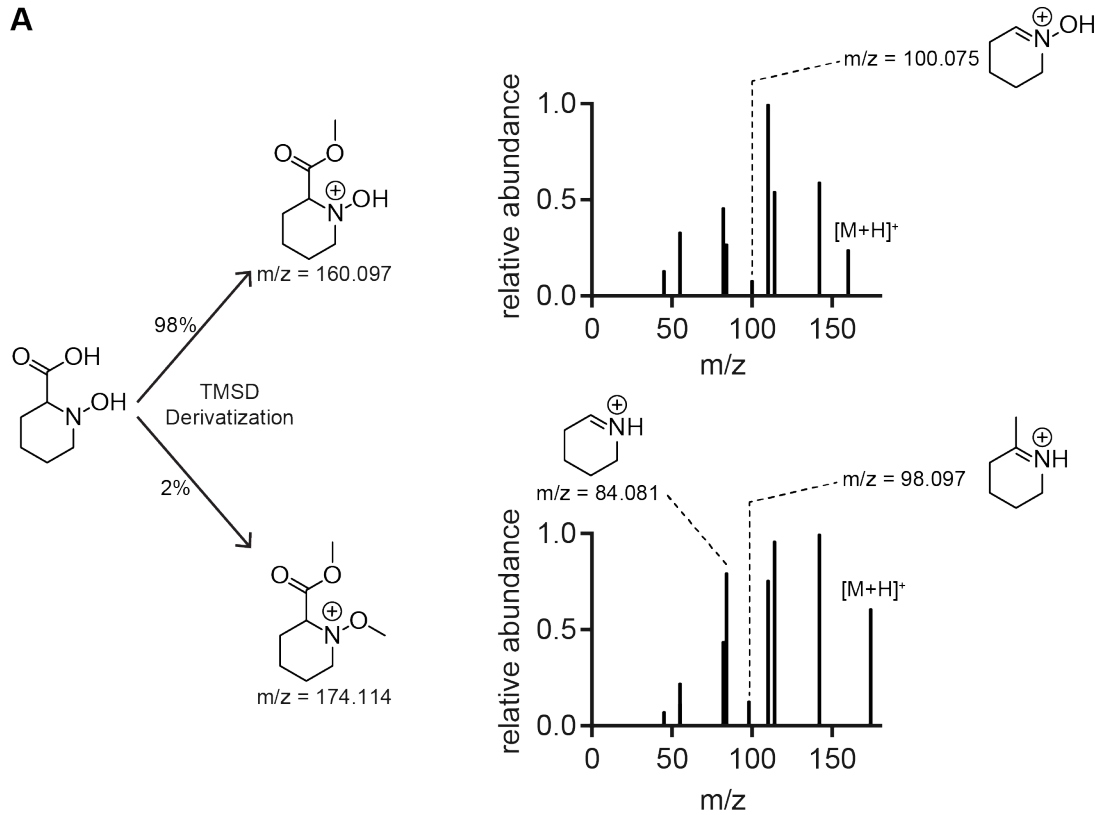

**B**

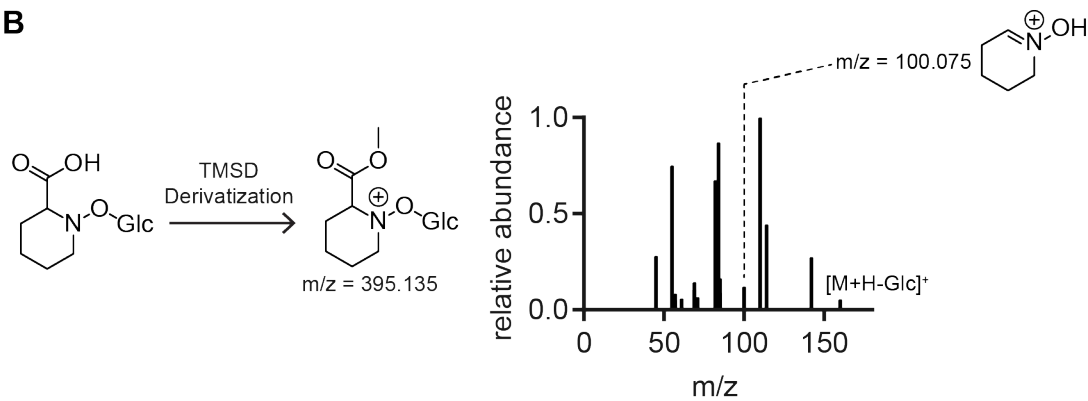

**Supplemental Figure 3. Trimethylsilyldiazomethane (TMSD) derivatization of NHP and NHP-Glc (Supports Figure 1).**

- (A) TMSD derivatization of synthetic NHP yielded 98% singly methylated and 2% doubly methylated product by extracted ion chromatogram (EIC) quantification. The single methylation is hypothesized to occur on the acid based on MS/MS fragmentation and the presence of an  $m/z$  100.075. MS/MS fragmentation for the doubly methylated product lacks  $m/z$  100.075.
- (B) TMSD derivatization of extracts from *N. benthamiana* leaves expressing ALD1 + FMO1 + UGT76B1 led to a singly methylated NHP-Glc product.  $m/z$  100.075 is present in the MS/MS fragmentation pattern, supporting methylation on the acid.

**A**

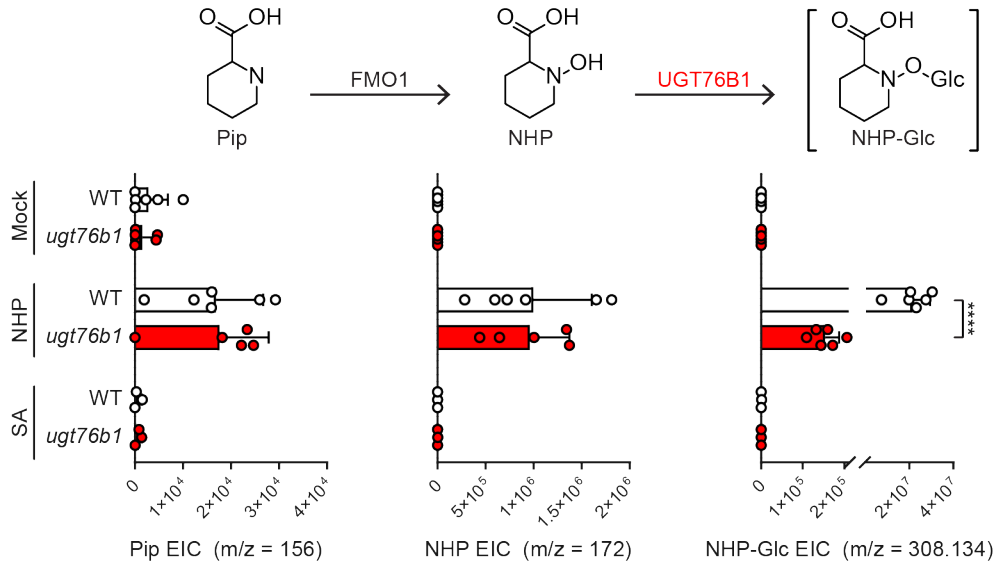

**B**

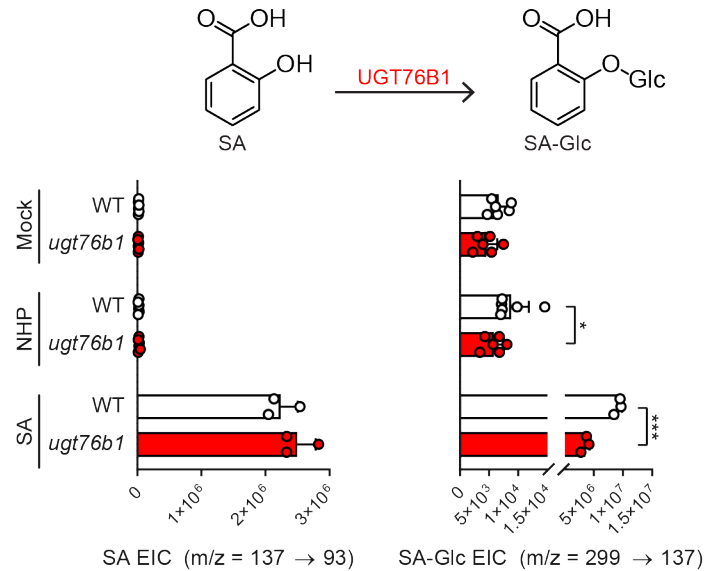

**Supplemental Figure 4. Metabolic profiling of Arabidopsis WT and *ugt76b1* mutant seedlings (Supports Figure 3).**

Arabidopsis WT (white bars) and *ugt76b1* (red bars) seedlings were grown hydroponically and treated with 1 mM MgCl<sub>2</sub> (mock), 1 mM NHP, or 100  $\mu$ M SA. Bars show abundances of NHP-related metabolites (A) and SA-related metabolites (B) 24 h after treatment. Bars represent the means  $\pm$  SD ( $n = 6$  (mock and NHP treatments) or 3 (SA treatments) independent biological replicates). Pip and NHP were measured as TMS and 2-TMS derivatives respectively using GC-MS. NHP-Glc, SA, and SA-Glc were measured using LC-MS. Values reported as zero indicate no detection of metabolites. Asterisks indicate a significant metabolite decrease (one-tailed  $t$  test; \* $P < 0.05$ , \*\*\* $P < 0.001$ , \*\*\*\* $P < 0.0001$ ).

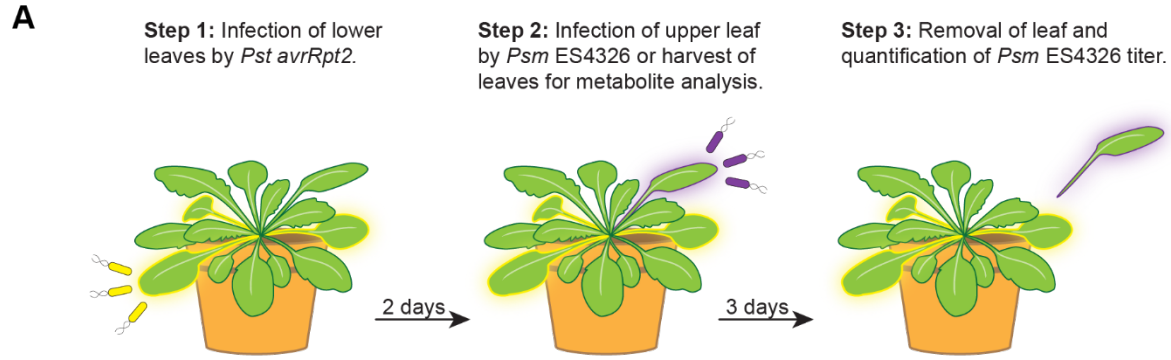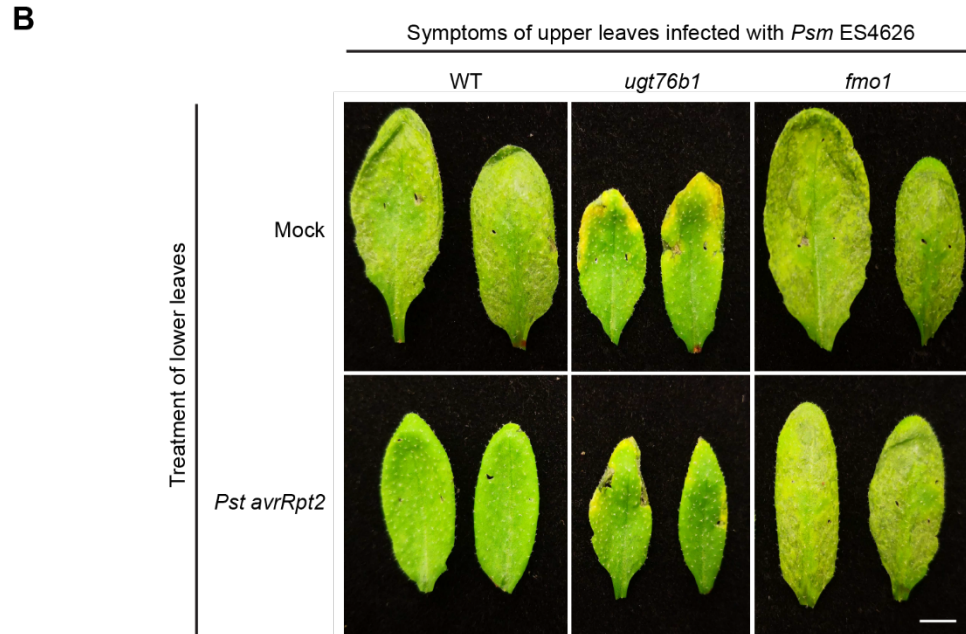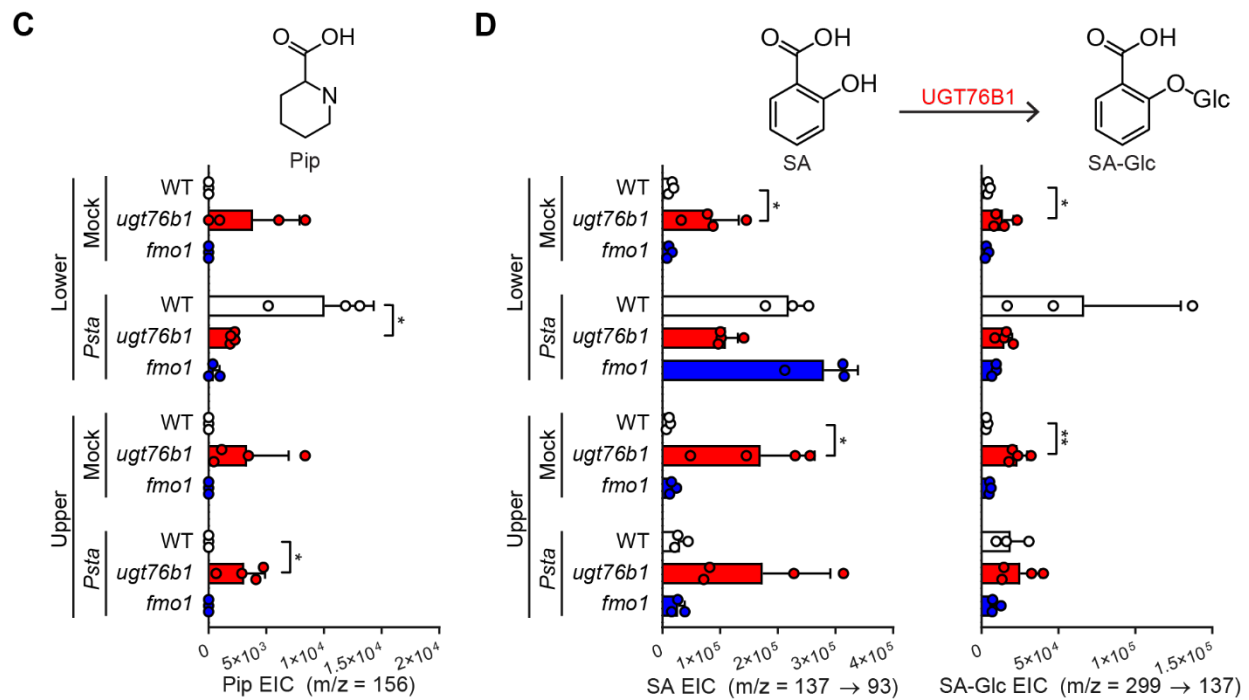

**Supplemental Figure 5. Metabolic profiling of Arabidopsis WT, *fmo1* and *ugt76b1* plants in SAR experiment (Supports Figure 4).**

- (A) Design of SAR assays in Arabidopsis. Three lower leaves (leaf number 5-7) of each plant were infiltrated with a  $5 \times 10^6$  cfu/ml suspension of *Pst avrRpt2* (*Psta*) (local infection) or 10 mM  $MgCl_2$  as a mock control. For phenotype images in (B): two days after local infection, one upper leaf (leaf number 10) of each plant was challenged with  $1 \times 10^5$  cfu/ml suspension of *Psm* ES4326 (distal infection). Three days later, the disease symptoms of upper leaves were photographed. For metabolite analysis in (C) and (D): two days after local infection with *Pst avrRpt2*, the three lower infected leaves and three upper uninfected leaves (leaf numbers 8, 9, and 10) were harvested and separately pooled for metabolite analysis.
- (B) Disease symptoms of two representative upper leaves inoculated with *Psm* ES4326 at 3 dpi. Scale bar = 0.5 cm.
- (C) Extracted ion abundances of Pip in methanolic tissue extracts from lower and upper leaves of WT (white bars), *ugt76b1* (red bars), and *fmo1* (blue bars) leaves. Bars represent the means  $\pm$  SD ( $n = 3$  or 4 independent biological replicates). Pip was measured as a TMS derivative using GC-MS. Values reported as zero indicate no detection of metabolites. Asterisks indicate a significant metabolite increase or decrease (one-tailed  $t$  test;  $*P < 0.05$ ).
- (D) Extracted ion abundances of SA and SA-Glc in methanolic tissue extracts from lower and upper leaves of WT (white bars), *ugt76b1* (red bars), and *fmo1* (blue bars) plants. Bars represent the means  $\pm$  SD ( $n = 3$  or 4 independent biological replicates). SA and SA-Glc were measured using LC-MS. Values reported as zero indicate no detection of metabolites. Asterisks indicate a significant metabolite increase or decrease (one-tailed  $t$  test;  $*P < 0.05$ ,  $**P < 0.01$ ).



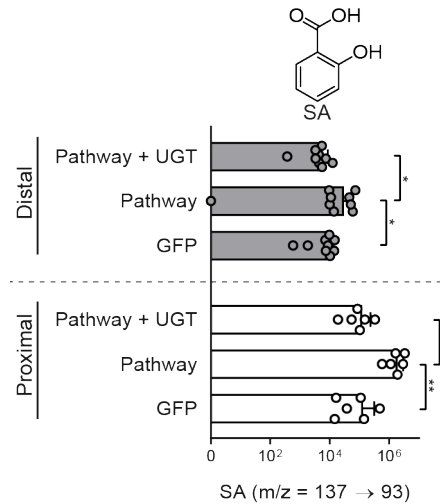

**Supplemental Figure 6. Abundance of SA in distal leaflets of tomato during transient expression of NHP-Glc pathway genes (Supports Figure 5).**

Abundance of SA in tomato proximal leaflets expressing GFP, Pathway (GFP + ALD1 + FMO1), and Pathway + UGT (white bars) and leaflets distal to those infiltrated with *Agrobacteria* (grey bars). Bars for proximal leaflets represent means  $\pm$  SD (two leaflets each from  $n = 3$  independent plants). Bars for distal leaflets represent means  $\pm$  SD (three leaflets each from  $n = 3$  independent plants). Values reported as zero indicate no detection of metabolites. SA was measured using LC-MS. Asterisks indicate a significant metabolite difference (one-tailed  $t$  test; \* $P < 0.05$ , \*\* $P < 0.01$ ). Data are identical to that in Figure 5 with a different x-axis scale.

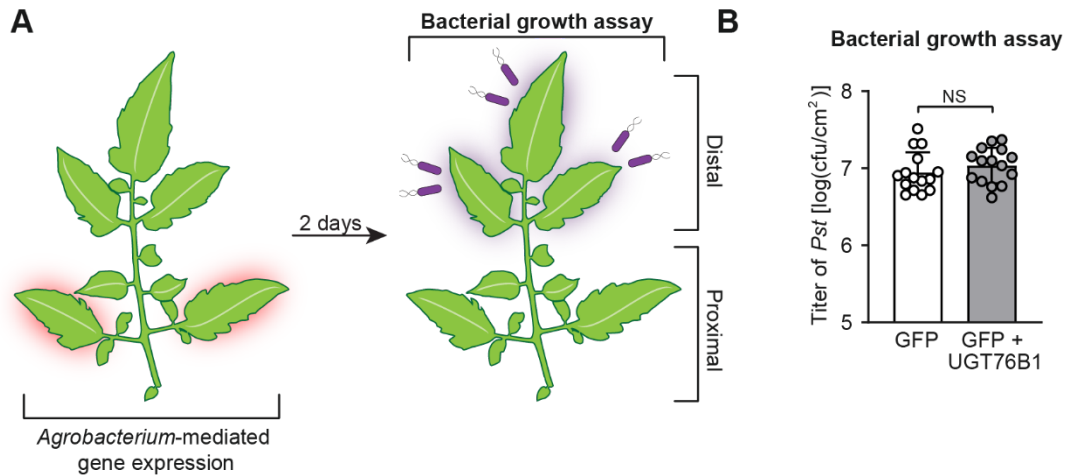

**Supplemental Figure 7. Effect of transient expression of Arabidopsis UGT76B1 in tomato leaves for transient SAR analysis (Supports Figure 5).**

- (A) Design of transient SAR assays in tomato. Two leaflets of a tomato leaf proximal to the main stem (highlighted in red) were inoculated with *Agrobacteria* harboring *GFP* or *GFP* + Arabidopsis *UGT76B1*. For bacterial growth assay in (B): two days post infiltration with *Agrobacteria*, distal leaflets (highlighted in purple) were inoculated with a  $1 \times 10^5$  cfu/ml suspension of *Pst*. Four dpi, distal leaflets were harvested for quantification of *Pst* titers.
- (B) The titer of *Pst* in the distal leaflets was determined at 4 days post-inoculation. Bars represent means  $\log(\text{cfu}/\text{cm}^2) \pm \text{SD}$  (three leaflets each from  $n = 5$  independent plants). NS – not significant.

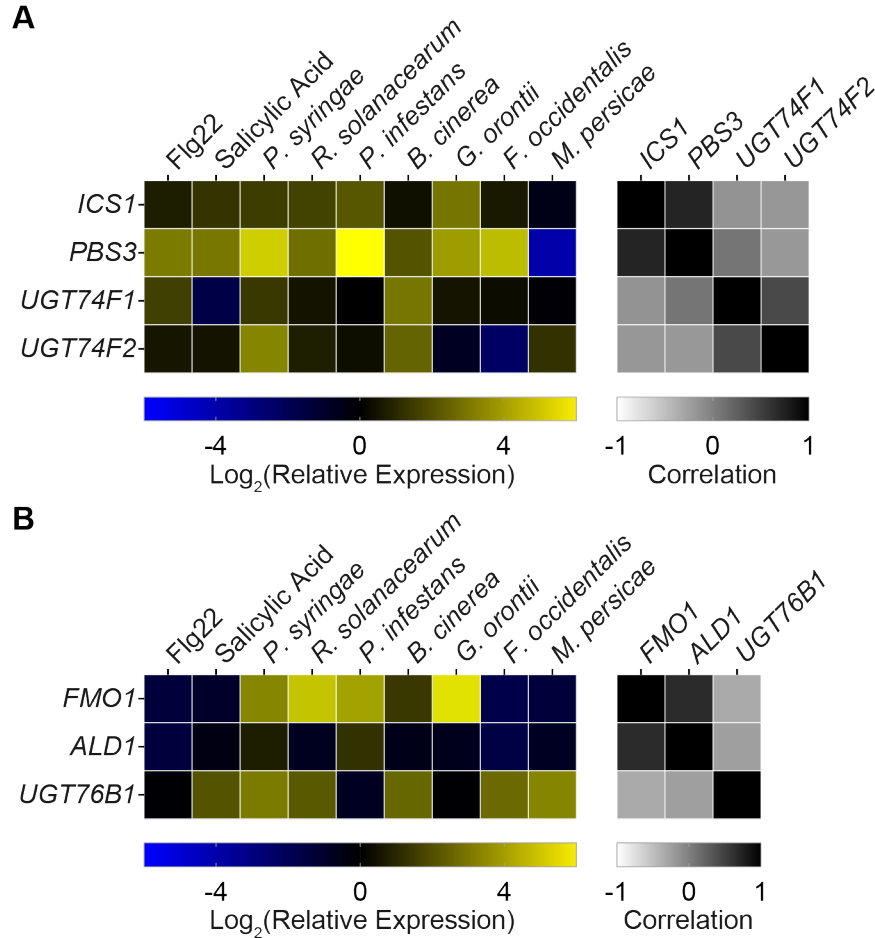

**Supplemental Figure 8. mRNA expression and coexpression analysis of SA-Glc and NHP-Glc biosynthetic genes in Arabidopsis obtained from publicly available microarray data.**

(A) Log transformed relative mRNA expression of SA biosynthetic genes (*ICS1*; *PBS3*) and glycosyltransferases (*UGT74F1*; *UGT74F2*) under biotic stress conditions.

(B) Log transformed relative mRNA expression of NHP biosynthetic genes (*FMO1*; *ALD1*) and glycosyltransferase (*UGT76B1*) under biotic stress conditions.

For both A and B, biotic treatments were: Fig22 (flagellin peptide), SA (salicylic acid hormone), bacterial pathogens (*Pseudomonas syringae* pv. *tomato* DC3000 and *Ralstonia solanacearum*), fungal/oomycete/ascomycetes pathogens (*Botrytis cinerea*, *Phytophthora infestans*, and *Erysiphe orontii*), and insects/pests (*Frankliniella occidentalis* and *Myzus persicae*).  $\text{Log}_2(\text{relative expression})$  is plotted on a linear gradient from -5 (blue) to 5 (yellow). Pearson's  $r$  correlation between the plotted expression patterns of respective SA biosynthetic genes is plotted on a linear gradient from -1 (white) to 1 (black).

**Supplemental Table 1. Primers used in this study.** Lowercase letters indicate overlap with destination plasmid and uppercase letters indicate gene-specific sequence. F = Forward primer; R = Reverse primer. All sequences 5'-3'.

|                  |                                                   |
|------------------|---------------------------------------------------|
| UGT71B4_F        | ttctgccaaattcgcaATGTTCTGTTCTTCAATGATCGA           |
| UGT71B4_R        | gtgatggtgatggtgatgcTTAAGCAACATTCTCTATCACGTCT      |
| UGT73B2_F        | ttctgccaaattcgcaATGGGTAGTGATCATCATCATCGA          |
| UGT73B2_R        | gtgatggtgatggtgatgcTTATGAACTAACTCTTCCATGAAGCTG    |
| UGT73B3_F        | ttctgccaaattcgcaATGAGTAGTGATCCTCATCGTAAGC         |
| UGT73B3_R        | gtgatggtgatggtgatgcTTACGAGGTAACTCTTCTATGAAGCT     |
| UGT73C3_F        | ttctgccaaattcgcaATGGCTACGGAAAAAACCAC              |
| UGT73C3_R        | gtgatggtgatggtgatgcTCAATTCTTGAATTGTGCTAGTTGC      |
| UGT73C5_F        | ttctgccaaattcgcaATGGTTTCCGAAACAACCAA              |
| UGT73C5_R        | gtgatggtgatggtgatgcTCAATTATTGGTTCTGCCAGT          |
| UGT73D1_F        | ttctgccaaattcgcaATGCATAAACATTTGCTAAACCCA          |
| UGT73D1_R        | gtgatggtgatggtgatgcCTACACGAGACTCAATTGCTCC         |
| UGT74F2_F        | ttctgccaaattcgcaATGGAGCATAAGAGAGGACATGT           |
| UGT74F2_R        | gtgatggtgatggtgatgcCTATTTGCTCTGAACCCTTGA          |
| UGT76B1_F        | ttctgccaaattcgcaATGGAGACTAGAGAAACAAAACCACT        |
| UGT76B1_R        | gtgatggtgatggtgatgcTTAGAAAGACAATATATAAGCAA        |
| UGT76F2_F        | ttctgccaaattcgcaATGGAAGAGAGAAAAGGGAGGAG           |
| UGT76F2_R        | gtgatggtgatggtgatgcTTAACTTGCAAAAGCATAAGAATCA      |
| UGT85A1_F        | ttctgccaaattcgcaATGGGATCTCAGATCATTCA              |
| UGT85A1_R        | gtgatggtgatggtgatgcTTAATCCTGTGATTTTTGTCCCA        |
| UGT85A7_F        | ttctgccaaattcgcaATGGAATCTCATGTTGTTTCATAACGC       |
| UGT85A7_R        | gtgatggtgatggtgatgcTCATCTAAGATTTTCTAAGAAAAC       |
| UGT86A2_F        | ttctgccaaattcgcaATGGCGGACGTTAGAAAACCC             |
| UGT86A2_R        | gtgatggtgatggtgatgcTTAAGCTTTCCATTAGATAAACCAACC    |
| UGT89A2_F        | ttctgccaaattcgcaATGACGGAAGTGTATTGTTGCC            |
| UGT89A2_R        | gtgatggtgatggtgatgcTTAGACTTTTTCAAATCTTTGACAAGT    |
| UGT92A1_F        | ttctgccaaattcgcaATGGCGGAAGCTAAACCCAG              |
| UGT92A1_R        | gtgatggtgatggtgatgcTCAATTCTCCACTTTCTTGACCA        |
| UGT73B4_F        | ttctgccaaattcgcaATGAACAGAGAGCAAATTCA              |
| UGT73B4_R        | tgatggtgatggtgatgcCTACTTTCTACCATTGAGCTCTTCC       |
| UGT87A2_F        | ttctgccaaattcgcaATGGATCCAAATGAATCTCCACCA          |
| UGT87A2_R        | tgatggtgatggtgatgcTTAATTTGTATTGGTAATATGCCGAACG    |
| UGT76E12_F       | ttctgccaaattcgcaATGCAGGTTTTGGGAATGGAG             |
| UGT76E12_R       | gtgatggtgatggtgatgcTCATAGAGTCCTTATGAAGTGACA       |
| At1g78800_F      | ttctgccaaattcgcaATGGCGAAAAAAGAAGGTTCA             |
| At1g78800_R      | gtgatggtgatggtgatgcTCAATCTTCTTTAGGACTTGATACGAC    |
| UGT76B1_pET24B_F | ggacagcaaatgggtcgATGGAGACTAGAGAAACAAAACCACT       |
| UGT76B1_pET24B_R | tggtggtggtggtggtgcCCGAAAGACAATATATAAGCA           |
| UGT76B1_His_F    | ttctgccaaattcgcaATGGAGACTAGAGAAACAAAACCACT        |
| UGT76B1_His_R    | atggtgatggtgatgcccGAAAGACAATATATAAGCAATTAAGTTTTCG |

## Parsed Citations

- Bauer, S., Mekonnen, D.W., Geist, B., Lange, B., Ghirardo, A., Zhang, W., and Schäffner, A.R. (2020).** The isoleucic acid triad: distinct impacts on plant defense, root growth, and formation of reactive oxygen species. *Journal of Experimental Botany*, eeraa160.  
Pubmed: [Author and Title](#)  
Google Scholar: [Author Only Title Only Author and Title](#)
- Bernsdorff, F., Doring, A.C., Gruner, K., Schuck, S., Brautigam, A., and Zeier, J. (2016).** Pipecolic acid orchestrates plant systemic acquired resistance and defense priming via salicylic acid-dependent and -independent pathways. *Plant Cell* 28, 102-129.  
Pubmed: [Author and Title](#)  
Google Scholar: [Author Only Title Only Author and Title](#)
- Boachon, B., Garrir, J., Pastor, V., Erb, M., Dean, J.V., Flors, V., and Mauch-Mani, B. (2014).** Role of two UDP-Glycosyltransferases from the L group of *Arabidopsis* in resistance against *Pseudomonas syringae*. *European Journal of Plant Pathology* 139, 707-720.  
Pubmed: [Author and Title](#)  
Google Scholar: [Author Only Title Only Author and Title](#)
- Caarls, L., Elberse, J., Awwanah, M., Ludwig, N.R., de Vries, M., Zeilmaker, T., Van Wees, S.C.M., Schuurink, R.C., and Van den Ackerveken, G. (2017).** *Arabidopsis* JASMONATE-INDUCED OXYGENASES down-regulate plant immunity by hydroxylation and inactivation of the hormone jasmonic acid. *Proceedings of the National Academy of Sciences USA* 114, 6388.  
Pubmed: [Author and Title](#)  
Google Scholar: [Author Only Title Only Author and Title](#)
- Chen, Y.-C., Holmes, E.C., Rajniak, J., Kim, J.-G., Tang, S., Fischer, C.R., Mudgett, M.B., and Sattely, E.S. (2018).** N-hydroxy-pipecolic acid is a mobile metabolite that induces systemic disease resistance in *Arabidopsis*. *Proceedings of the National Academy of Sciences USA*, E4920-E4929.  
Pubmed: [Author and Title](#)  
Google Scholar: [Author Only Title Only Author and Title](#)
- Choi, S., Cho, Y.-h., Kim, K., Matsui, M., Son, S.-H., Kim, S.-K., Fujioka, S., and Hwang, I. (2013).** BAT1, a putative acyltransferase, modulates brassinosteroid levels in *Arabidopsis*. *The Plant Journal* 73, 380-391.  
Pubmed: [Author and Title](#)  
Google Scholar: [Author Only Title Only Author and Title](#)
- Craigon, D.J., James, N., Okyere, J., Higgins, J., Jotham, J., and May, S. (2004).** NASCArrays: a repository for microarray data generated by NASC's transcriptomics service. *Nucleic Acids Research* 32, D575-D577.  
Pubmed: [Author and Title](#)  
Google Scholar: [Author Only Title Only Author and Title](#)
- George Thompson, A.M., Iancu, C.V., Neet, K.E., Dean, J.V., and Choe, J.-y. (2017).** Differences in salicylic acid glucose conjugations by UGT74F1 and UGT74F2 from *Arabidopsis thaliana*. *Scientific Reports* 7, 46629.  
Pubmed: [Author and Title](#)  
Google Scholar: [Author Only Title Only Author and Title](#)
- Glazebrook, J. (2005).** Contrasting mechanisms of defense against biotrophic and necrotrophic pathogens. *Annual Review of Phytopathology* 43, 205-227.  
Pubmed: [Author and Title](#)  
Google Scholar: [Author Only Title Only Author and Title](#)
- Hartmann, M., and Zeier, J. (2018).** l-lysine metabolism to N-hydroxypipecolic acid: an integral immune-activating pathway in plants. *The Plant Journal* 96, 5-21.  
Pubmed: [Author and Title](#)  
Google Scholar: [Author Only Title Only Author and Title](#)
- Hartmann, M., and Zeier, J. (2019).** N-hydroxypipecolic acid and salicylic acid: a metabolic duo for systemic acquired resistance. *Current Opinion in Plant Biology* 50, 44-57.  
Pubmed: [Author and Title](#)  
Google Scholar: [Author Only Title Only Author and Title](#)
- Hartmann, M., Zeier, T., Berndorff, F., Reichel-Deland, V., Kim, D., Hohmann, M., Scholten, N., Schuck, S., Brautigam, A., Holzel, T., Ganter, C., and Zeier, J. (2018).** Flavin monooxygenase-generated N-hydroxypipecolic acid is a critical element of plant systemic immunity. *Cell* 173, 1-14.  
Pubmed: [Author and Title](#)  
Google Scholar: [Author Only Title Only Author and Title](#)
- Heil, M., Hilpert, A., Kaiser, W., and Linsenmair, K.E. (2000).** Reduced growth and seed set following chemical induction of pathogen defence: does systemic acquired resistance (SAR) incur allocation costs? *Journal of Ecology* 88, 645-654.  
Pubmed: [Author and Title](#)  
Google Scholar: [Author Only Title Only Author and Title](#)
- Holmes, E.C., Chen, Y.-C., Sattely, E.S., and Mudgett, M.B. (2019).** An engineered pathway for N-hydroxy-pipecolic acid synthesis enhances systemic acquired resistance in tomato. *Science Signaling* 12, eaay3066.  
Pubmed: [Author and Title](#)  
Google Scholar: [Author Only Title Only Author and Title](#)

- Huot, B., Yao, J., Montgomery, B.L., and He, S.Y. (2014). Growth-defense tradeoffs in plants: A balancing act to optimize fitness. *Molecular Plant* 7, 1267-1287.  
Pubmed: [Author and Title](#)  
Google Scholar: [Author Only Title Only Author and Title](#)
- Kapila, J., De Rycke, R., Van Montagu, M., and Angenon, G. (1997). An Agrobacterium-mediated transient gene expression system for intact leaves. *Plant Science* 122, 101-108.  
Pubmed: [Author and Title](#)  
Google Scholar: [Author Only Title Only Author and Title](#)
- Klessig, D.F., Choi, H.W., and Dempsey, D.M.A. (2018). Systemic acquired resistance and salicylic acid: Past, present, and future. *Molecular Plant-Microbe Interactions* 31, 871-888.  
Pubmed: [Author and Title](#)  
Google Scholar: [Author Only Title Only Author and Title](#)
- Kühnel, E., Laffan, D.D.P., Lloyd-Jones, G.C., Martínez del Campo, T., Shepperson, I.R., and Slaughter, J.L. (2007). Mechanism of methyl esterification of carboxylic acids by trimethylsilyldiazomethane. *Angewandte Chemie International Edition* 46, 7075-7078.  
Pubmed: [Author and Title](#)  
Google Scholar: [Author Only Title Only Author and Title](#)
- Lee, H.I., León, J., and Raskin, I. (1995). Biosynthesis and metabolism of salicylic acid. *Proceedings of the National Academy of Sciences USA* 92, 4076-4079.  
Pubmed: [Author and Title](#)  
Google Scholar: [Author Only Title Only Author and Title](#)
- Lim, E.-K., Doucet, C.J., Li, Y., Elias, L., Worrall, D., Spencer, S.P., Ross, J., and Bowles, D.J. (2002). The activity of arabidopsis glycosyltransferases toward salicylic acid, 4-hydroxybenzoic acid, and other benzoates. *Journal of Biological Chemistry* 277, 586-592.  
Pubmed: [Author and Title](#)  
Google Scholar: [Author Only Title Only Author and Title](#)
- Liu, P.-P., Yang, Y., Pichersky, E., and Klessig, D.F. (2009). Altering expression of benzoic acid/salicylic acid carboxyl methyltransferase 1 compromises systemic acquired resistance and PAMP-triggered immunity in Arabidopsis. *Molecular Plant-Microbe Interactions* 23, 82-90.  
Pubmed: [Author and Title](#)  
Google Scholar: [Author Only Title Only Author and Title](#)
- Liu, Z., Yan, J.-P., Li, D.-K., Luo, Q., Yan, Q., Liu, Z.-B., Ye, L.-M., Wang, J.-M., Li, X.-F., and Yang, Y. (2015). UDP-Glucosyltransferase71C5, a major glucosyltransferase, mediates abscisic acid homeostasis in Arabidopsis. *Plant Physiology* 167, 1659.  
Pubmed: [Author and Title](#)  
Google Scholar: [Author Only Title Only Author and Title](#)
- Maksym, R.P., Ghirardo, A., Zhang, W., von Saint Paul, V., Lange, B., Geist, B., Hajirezaei, M.-R., Schnitzler, J.-P., and Schöffner, A.R. (2018). The defense-related isoleucic acid differentially accumulates in Arabidopsis among branched-chain amino acid-related 2-hydroxy carboxylic acids. *Frontiers in Plant Science* 9, 766.  
Pubmed: [Author and Title](#)  
Google Scholar: [Author Only Title Only Author and Title](#)
- Mauch, F., Mauch-Mani, B., Gaille, C., Kull, B., Haas, D., and Reimann, C. (2001). Manipulation of salicylate content in Arabidopsis thaliana by the expression of an engineered bacterial salicylate synthase. *The Plant Journal* 25, 67-77.  
Pubmed: [Author and Title](#)  
Google Scholar: [Author Only Title Only Author and Title](#)
- Nakamura, Y., Mithöfer, A., Kombrink, E., Boland, W., Hamamoto, S., Uozumi, N., Tohma, K., and Ueda, M. (2011). 12-Hydroxyjasmonic acid glucoside is a COI1-JAZ-independent activator of leaf-closing movement in Samanea saman. *Plant Physiology* 155, 1226.  
Pubmed: [Author and Title](#)  
Google Scholar: [Author Only Title Only Author and Title](#)
- Nakazawa, M., Yabe, N., Ichikawa, T., Yamamoto, Y.Y., Yoshizumi, T., Hasunuma, K., and Matsui, M. (2001). DFL1, an auxin-responsive GH3 gene homologue, negatively regulates shoot cell elongation and lateral root formation, and positively regulates the light response of hypocotyl length. *The Plant Journal* 25, 213-221.  
Pubmed: [Author and Title](#)  
Google Scholar: [Author Only Title Only Author and Title](#)
- Navarova, H., Bernsdorff, F., Doring, A.C., and Zeier, J. (2012). Pipecolic acid, an endogenous mediator of defense amplification and priming, is a critical regulator of inducible plant immunity. *The Plant Cell* 24, 5123-5141.  
Pubmed: [Author and Title](#)  
Google Scholar: [Author Only Title Only Author and Title](#)
- Ning, Y., Liu, W., and Wang, G.-L. (2017). Balancing immunity and yield in crop plants. *Trends in Plant Science* 22, 1069-1079.  
Pubmed: [Author and Title](#)  
Google Scholar: [Author Only Title Only Author and Title](#)
- Noutoshi, Y., Okazaki, M., Kida, T., Nishina, Y., Morishita, Y., Ogawa, T., Suzuki, H., Shibata, D., Jikumaru, Y., Hanada, A., Kamiya, Y., and



**Shirasu, K. (2012). Novel plant immune-priming compounds identified via high-throughput chemical screening target salicylic acid glucosyltransferases in Arabidopsis. The Plant Cell 24, 3795.**

Pubmed: [Author and Title](#)

Google Scholar: [Author Only Title Only Author and Title](#)

**Osmani, S.A, Bak, S., and Møller, B.L. (2009). Substrate specificity of plant UDP-dependent glucosyltransferases predicted from crystal structures and homology modeling. Phytochemistry 70, 325-347.**

Pubmed: [Author and Title](#)

Google Scholar: [Author Only Title Only Author and Title](#)

**Paquette, S., Møller, B.L., and Bak, S. (2003). On the origin of family 1 plant glucosyltransferases. Phytochemistry 62, 399-413.**

Pubmed: [Author and Title](#)

Google Scholar: [Author Only Title Only Author and Title](#)

**Peyret, H., and Lomonosoff, G.P. (2013). The pEAQ vector series: the easy and quick way to produce recombinant proteins in plants. Plant Molecular Biology 83, 51-58.**

Pubmed: [Author and Title](#)

Google Scholar: [Author Only Title Only Author and Title](#)

**Piotrowska, A., and Bajguz, A. (2011). Conjugates of abscisic acid, brassinosteroids, ethylene, gibberellins, and jasmonates. Phytochemistry 72, 2097-2112.**

Pubmed: [Author and Title](#)

Google Scholar: [Author Only Title Only Author and Title](#)

**Rajniak, J., Barco, B., Clay, N.K., and Sattely, E.S. (2015). A new cyanogenic metabolite in Arabidopsis required for inducible pathogen defence. Nature 525, 376-379.**

Pubmed: [Author and Title](#)

Google Scholar: [Author Only Title Only Author and Title](#)

**Sessions, A, Burke, E., Presting, G., Aux, G., McElver, J., Patton, D., Dietrich, B., Ho, P., Bacwaden, J., Ko, C., Clarke, J.D., Cotton, D., Bullis, D., Snell, J., Miguel, T., Hutchison, D., Kimmerly, B., Mitzel, T., Katagiri, F., Glazebrook, J., Law, M., and Goff, S.A. (2002). A high-throughput Arabidopsis reverse genetics system. The Plant Cell 14, 2985.**

Pubmed: [Author and Title](#)

Google Scholar: [Author Only Title Only Author and Title](#)

**Shah, J., Chaturvedi, R., Chowdhury, Z., Venables, B., and Petros, R.A. (2014). Signaling by small metabolites in systemic acquired resistance. The Plant Journal 79, 645-658.**

Pubmed: [Author and Title](#)

Google Scholar: [Author Only Title Only Author and Title](#)

**Smirnova, E., Marquis, V., Poirier, L., Aubert, Y., Zumsteg, J., Ménard, R., Miesch, L., and Heitz, T. (2017). Jasmonic acid oxidase 2 hydroxylates jasmonic acid and represses basal defense and resistance responses against Botrytis cinerea infection. Molecular Plant 10, 1159-1173.**

Pubmed: [Author and Title](#)

Google Scholar: [Author Only Title Only Author and Title](#)

**Staswick, P.E., and Tiryaki, I. (2004). The oxylipin signal jasmonic acid is activated by an enzyme that conjugates it to isoleucine in Arabidopsis. The Plant Cell 16, 2117.**

Pubmed: [Author and Title](#)

Google Scholar: [Author Only Title Only Author and Title](#)

**Staswick, P.E., Serban, B., Rowe, M., Tiryaki, I., Maldonado, M.T., Maldonado, M.C., and Suza, W. (2005). Characterization of an Arabidopsis enzyme family that conjugates amino acids to indole-3-acetic acid. The Plant Cell 17, 616.**

Pubmed: [Author and Title](#)

Google Scholar: [Author Only Title Only Author and Title](#)

**Takase, T., Nakazawa, M., Ishikawa, A., Kawashima, M., Ichikawa, T., Takahashi, N., Shimada, H., Manabe, K., and Matsui, M. (2004). ydk1-D, an auxin-responsive GH3 mutant that is involved in hypocotyl and root elongation. The Plant Journal 37, 471-483.**

Pubmed: [Author and Title](#)

Google Scholar: [Author Only Title Only Author and Title](#)

**Topolewska, A., Czarnowska, K., Haliński, Ł.P., and Stepnowski, P. (2015). Evaluation of four derivatization methods for the analysis of fatty acids from green leafy vegetables by gas chromatography. Journal of Chromatography B 990, 150-157.**

Pubmed: [Author and Title](#)

Google Scholar: [Author Only Title Only Author and Title](#)

**von Saint Paul, V., Zhang, W., Kanawati, B., Geist, B., Faus-Keßler, T., Schmitt-Kopplin, P., and Schäffner, A.R. (2011). The Arabidopsis glucosyltransferase UGT76B1 conjugates isoleucic acid and modulates plant defense and senescence. The Plant Cell 23, 4124.**

Pubmed: [Author and Title](#)

Google Scholar: [Author Only Title Only Author and Title](#)

**Wang, B., Jin, S.-H., Hu, H.-Q., Sun, Y.-G., Wang, Y.-W., Han, P., and Hou, B.-K. (2012). UGT87A2, an Arabidopsis glucosyltransferase, regulates flowering time via FLOWERING LOCUS C. New Phytologist 194, 666-675.**

Pubmed: [Author and Title](#)

Google Scholar: [Author Only Title Only Author and Title](#)

**Wasternack, C., and Hause, B. (2013). Jasmonates: biosynthesis, perception, signal transduction and action in plant stress response, growth and development. An update to the 2007 review in Annals of Botany. Annals of Botany 111, 1021-1058.**

Pubmed: [Author and Title](#)

Google Scholar: [Author Only Title Only Author and Title](#)

**Westfall, C.S., Muehler, A.M., and Jez, J.M. (2013). Enzyme action in the regulation of plant hormone responses. Journal of Biological Chemistry 288, 19304-19311.**

Pubmed: [Author and Title](#)

Google Scholar: [Author Only Title Only Author and Title](#)

**Zegzouti, H., Engel, L., Vidugiris, G., and Goueli, S. (2013). Detection of glycosyltransferase activities with homogenous bioluminescent UDP detection assay. Glycobiology 23, 1340-1341.**

Pubmed: [Author and Title](#)

Google Scholar: [Author Only Title Only Author and Title](#)
